# Supplementary material for: Evidence-based practice profiles among bachelor students in four health disciplines: a cross-sectional study
Source: BMC Med Educ. 2018 Sep 14;18:210. doi: 10.1186/s12909-018-1319-7 (PMC6137748; doi:10.1186/s12909-018-1319-7)
Supplement: Supplementary file 5 — Dataset. The file provides the non-identifying data used in the current study (all data except gender and age). (XLSX 196 kb) [file 12909_2018_1319_MOESM5_ESM.xlsx]

## Sheet: Data EBP-bachelor
Q1	Q2	Q3	Q4	Q5	Q6	Q7	Q8	Q9	Q10	Q11	Q12	Q13	Q14	Q15	Q16	Q17	Q18	Q19	Q20	Q21	Q22	Q23	Q24	Q25	Q26	Q27	Q28	Q29	Q30	Q31	Q32	Q33	Q34	Q35	Q36	Q37	Q38	Q39	Q40	Q41	Q42	Q43	Q44	Q45	Q46	Q47	Q48	Q49	Q50
5	3	3	1	3	3	4	3	4	3	2	1	3	4	5	3	3	4	4	5	5	1	1	5	1	2	1	1	1	1	1	1	1	1	3	1	1	3	1	1	2	1	1	1	1	1	1	1	2	2
2	3	4	1	3	4	4	3	4	3	4	3	3	3	3	3	3	5	5	3	5	1	1	3	1	2	1	1	2	1	2	3	1	4	4	1	3	1	2	2	3	3	2	3	2	1	1	2	2	1
4	4	4	2	3	3	3	3	4	4	4	4	4	4	3	4	3	3	4	4	4	2	2	2	8	2	2	2	2	2	2	2	2	2	2	1	1	1	1	1	1	1	1	2	1	1	1	2	2	3
3	2	2	3	3	3	4	3	3	4	3	3	3	2	2	2	3	4	3	2	4	2	2	3	2	2	2	2	1	1	1	2	1	1	3	1	1	1	3	3	3	3	2	1	3	1	1	2	2	1
3	4	3	3	4	3	3	5	5	4	3	4	4	4	3	3	3	5	3	5	5	4	4	4	1	2	1	1	1	1	1	1	3	4	4	1	3	2	3	2	3	3	3	4	4	2	2	9	9	9
2	2	3	4	4	3	4	5	4	4	4	4	4	4	4	2	2	2	4	3	3	1	1	3	1	1	1	2	2	1	2	2	1	3	2	1	1	1	1	1	2	2	2	2	2	1	2	1	2	2
4	3	3	3	3	3	3	3	3	4	3	4	4	4	3	3	2	3	3	3	3	3	2	1	1	2	1	1	1	1	1	2	1	1	3	1	1	2	1	1	3	3	3	2	3	4	1	1	1	1
4	4	3	2	3	4	5	5	5	4	3	4	4	4	3	3	3	3	3	4	4	4	4	4	1	2	9	2	2	1	4	3	2	2	1	1	1	1	2	1	2	2	1	1	2	1	1	1	2	2
3	2	3	4	1	3	4	4	3	4	4	3	4	1	3	2	9	4	4	3	3	3	3	2	9	4	2	3	9	8	9	2	3	9	2	4	9	3	2	3	9	2	9	3	9	2	3	2	9	3
3	3	2	3	4	4	4	4	4	4	4	4	4	4	3	2	3	3	4	3	4	2	2	3	1	2	2	1	1	1	1	1	1	2	3	1	1	1	2	2	2	2	2	2	2	2	2	1	2	3
4	3	4	2	3	4	5	4	4	4	5	5	4	4	3	3	2	4	3	5	4	2	2	3	1	2	1	2	2	1	1	2	2	2	2	1	1	1	2	2	2	2	2	3	2	2	2	1	2	3
3	2	2	2	4	4	4	4	4	5	4	4	3	3	3	3	3	3	4	4	4	1	1	1	2	2	2	2	1	1	1	1	2	2	2	1	1	2	2	2	2	2	2	8	2	2	1	1	2	2
4	4	5	3	4	4	5	5	5	5	4	4	5	4	9	2	2	4	2	3	3	1	1	4	1	2	1	1	1	1	1	1	1	1	3	1	1	1	2	2	3	1	2	2	2	1	1	1	2	2
2	4	4	3	3	4	5	4	4	4	3	4	5	5	3	3	2	4	5	3	4	1	1	4	2	2	1	1	3	1	1	3	1	3	5	1	1	1	1	2	2	2	3	2	2	3	2	2	3	2
4	4	3	1	5	4	3	3	4	4	4	4	4	4	3	3	3	3	4	3	3	4	4	3	3	2	2	2	4	2	3	2	2	1	1	1	1	1	1	1	2	1	1	1	2	1	1	1	2	4
3	3	3	3	2	4	5	4	4	4	4	5	3	4	3	3	3	4	3	3	5	4	3	3	1	2	1	1	1	1	4	1	1	3	1	1	1	1	9	2	2	9	1	4	2	2	2	3	4	3
3	2	2	2	2	2	1	4	4	5	4	4	4	4	3	4	3	5	3	4	4	4	4	4	2	2	2	2	2	2	1	1	2	4	3	1	2	3	1	1	2	2	2	2	2	2	2	1	3	3
5	4	5	5	4	4	5	5	4	3	3	3	4	3	3	3	3	3	3	3	3	1	2	4	1	1	1	1	3	1	1	1	1	1	3	1	1	1	2	2	2	2	2	2	2	2	2	2	2	2
4	4	5	3	4	4	4	4	5	5	5	4	5	5	4	4	4	5	5	4	5	3	3	3	1	1	1	1	1	1	2	1	1	2	3	1	1	1	1	2	2	2	2	2	2	1	1	2	3	3
2	2	3	2	3	3	5	4	4	5	4	4	4	4	3	2	2	4	2	4	4	1	1	3	1	1	1	1	3	1	1	1	3	3	3	1	1	1	1	1	2	1	2	3	2	2	1	2	3	4
4	3	1	1	4	3	5	4	5	4	5	4	5	5	3	3	2	4	2	3	3	1	1	3	1	2	1	1	1	1	8	9	1	3	2	1	1	2	1	2	2	2	2	2	2	1	1	3	4	2
3	3	3	3	3	3	5	4	4	4	4	4	4	4	3	3	2	4	2	4	4	2	2	1	2	1	1	1	1	1	1	1	1	2	1	1	1	2	2	3	3	3	3	3	4	1	1	2	3	3
5	5	9	1	4	4	4	4	5	4	3	4	5	5	4	3	2	3	3	3	4	2	2	3	1	2	4	2	1	1	2	1	2	4	3	1	1	1	1	1	3	2	2	2	2	1	1	1	3	1
4	5	4	3	3	3	4	4	4	4	3	3	4	4	4	2	3	5	4	2	4	4	3	4	2	3	4	2	4	1	4	4	2	3	4	1	2	3	2	3	4	3	2	2	4	2	2	9	9	9
3	4	5	3	4	4	4	4	5	5	5	4	3	3	3	2	3	3	4	3	4	1	1	2	1	2	1	1	1	1	1	2	1	3	3	1	1	3	2	2	2	2	2	2	2	2	2	1	3	2
3	3	4	2	4	3	3	4	5	4	4	4	5	3	3	2	3	5	3	4	4	2	2	3	1	2	2	2	2	2	2	2	2	2	4	2	2	2	1	1	3	2	2	2	3	2	1	2	2	2
3	1	2	1	3	4	4	3	4	4	3	4	4	4	3	3	2	4	5	2	4	4	4	4	3	2	2	2	1	1	2	2	3	3	4	1	3	3	2	2	2	2	2	2	2	1	1	1	2	2
4	3	3	2	2	2	4	3	3	2	2	3	3	3	2	3	3	3	3	3	4	3	3	2	2	2	4	1	2	1	3	3	3	2	2	2	1	1	2	3	2	2	2	5	2	2	1	1	3	3
4	3	5	3	4	4	5	5	5	5	4	4	3	4	9	2	2	3	3	2	4	1	1	3	3	2	1	2	2	1	1	2	1	3	4	1	1	2	2	1	2	2	2	2	2	1	1	2	3	1
4	4	4	1	4	4	4	4	4	3	3	3	4	3	3	2	2	3	3	4	3	1	1	4	1	2	1	1	1	1	1	1	1	3	3	2	2	2	2	2	3	1	2	2	2	2	1	2	4	4
3	3	4	2	3	4	4	4	4	4	4	4	4	4	3	2	2	4	3	3	3	3	3	2	2	2	1	1	4	1	2	3	2	2	3	1	1	2	1	2	2	2	2	2	2	2	2	2	2	2
5	4	4	2	4	4	4	4	4	4	3	3	4	4	3	1	1	2	2	4	4	1	1	2	1	1	2	1	1	1	1	2	1	2	2	1	1	1	9	3	2	2	2	2	3	2	1	2	4	3
4	4	4	4	3	4	4	4	4	4	4	4	4	4	3	2	3	4	3	3	3	3	3	2	2	2	2	2	2	2	2	2	2	2	2	2	2	2	2	2	2	2	2	2	2	2	2	1	1	1
3	3	4	4	5	4	4	3	4	4	3	3	4	4	4	5	3	4	5	3	4	4	4	2	2	2	2	2	2	2	3	2	2	2	3	1	3	2	9	3	4	4	2	2	4	2	9	2	2	1
3	3	4	2	3	4	5	5	3	4	4	4	3	3	3	4	3	3	4	3	3	1	1	3	2	3	1	2	1	1	1	2	1	3	5	1	1	3	1	2	2	2	2	2	3	3	2	2	3	2
3	3	3	3	4	3	5	5	3	4	4	4	3	3	3	3	3	4	4	3	3	3	3	3	2	2	2	2	2	1	2	2	1	2	4	1	2	2	2	2	2	2	2	2	2	2	2	2	2	3
3	3	9	2	3	3	4	4	4	4	4	4	4	4	3	2	3	3	3	3	2	2	2	3	1	1	1	2	1	1	2	1	2	3	1	1	2	3	1	1	4	3	3	4	3	2	1	2	3	2
3	3	3	3	3	3	4	3	3	5	4	3	3	3	3	3	3	3	4	2	4	1	1	1	1	2	2	2	2	1	3	3	3	3	1	1	1	1	1	1	3	3	2	3	3	3	3	2	3	2
4	4	4	2	4	4	5	5	4	4	4	4	4	4	3	1	3	4	3	4	3	3	4	2	1	1	1	1	1	1	1	2	3	3	1	1	1	1	2	2	2	2	3	3	2	2	2	1	3	2
4	4	4	4	4	4	5	4	4	5	4	4	4	4	3	2	2	3	3	3	4	2	1	4	1	3	2	1	1	1	1	3	2	3	4	1	2	1	1	2	2	2	1	2	2	2	1	2	2	2
4	4	5	4	5	5	5	5	5	5	5	5	5	5	4	1	1	2	2	2	2	2	2	3	1	2	1	2	2	1	1	2	1	2	4	2	2	3	2	2	2	2	3	3	2	3	3	9	9	9
4	4	4	2	5	3	5	3	4	4	5	4	5	4	3	2	4	4	3	2	2	1	1	2	1	2	1	1	1	1	1	1	1	2	1	1	2	2	1	1	4	4	2	1	4	2	1	3	3	2
5	5	5	4	3	3	3	3	5	4	3	3	4	3	3	2	2	3	3	3	5	3	3	4	1	2	1	1	1	1	2	2	2	3	2	1	1	1	2	2	3	2	2	3	3	2	1	2	4	2
4	4	5	3	5	4	5	5	4	5	4	5	5	4	3	2	2	5	3	2	3	2	2	1	1	1	1	1	1	1	1	1	1	2	1	1	1	1	2	2	3	3	2	2	2	1	1	3	2	4
4	4	4	4	4	3	4	3	4	3	3	4	5	4	3	3	3	5	4	3	4	4	4	3	1	2	1	1	1	1	4	1	1	3	1	1	1	1	2	2	2	2	3	2	2	2	1	2	3	3
3	1	4	1	4	5	5	5	3	5	5	4	4	4	4	4	4	5	3	5	5	1	1	3	1	3	1	1	1	1	1	1	2	5	3	1	1	1	4	3	4	4	4	4	5	2	2	1	2	2
4	4	5	2	5	5	5	5	4	4	4	5	3	4	3	2	3	4	5	2	4	1	1	5	1	3	1	2	3	1	3	5	1	3	5	1	1	3	1	1	4	1	2	5	4	2	1	1	1	1
5	4	3	3	3	4	4	4	4	4	3	3	4	3	5	3	3	5	4	4	4	3	3	5	3	2	8	2	2	1	2	5	1	5	5	1	3	1	2	2	2	2	2	2	3	1	1	1	3	4
5	5	3	1	3	4	5	5	3	4	3	4	4	2	4	1	3	4	2	4	4	3	3	5	2	1	1	2	1	1	1	1	1	1	1	1	1	1	3	4	3	2	3	2	3	2	3	2	2	1
4	3	3	2	3	5	5	5	4	4	4	4	4	4	3	2	2	4	3	4	4	1	1	4	2	3	2	1	1	1	1	1	1	3	3	1	1	1	1	2	4	3	2	3	3	1	1	3	4	3
4	3	3	2	5	3	3	3	5	4	4	5	5	5	3	2	1	4	4	5	4	1	1	3	3	2	1	1	2	1	1	3	1	3	4	1	1	1	1	1	3	2	3	3	3	3	2	1	3	3
3	3	4	2	4	4	5	4	4	4	4	5	5	5	4	2	9	4	8	4	4	3	4	4	1	2	2	3	1	1	1	3	1	2	1	1	1	1	2	2	4	3	4	4	3	2	1	1	4	4
5	4	5	4	4	3	4	4	4	3	4	3	4	3	3	3	3	3	4	3	4	1	1	3	1	3	1	1	1	1	1	3	1	3	4	1	1	3	2	2	3	2	2	3	3	2	2	2	3	3
4	4	3	3	4	4	5	4	4	4	3	4	4	4	3	3	3	4	4	3	3	2	2	4	1	2	2	3	1	1	3	5	3	3	1	1	1	1	2	2	2	2	2	2	2	2	2	1	4	3
5	4	4	3	5	5	5	5	5	5	5	4	5	4	4	1	3	3	3	4	3	1	1	2	1	1	1	1	1	1	3	1	1	1	1	1	1	1	2	2	2	2	2	4	2	3	2	2	3	2
3	2	4	3	3	3	3	3	4	3	3	4	4	4	4	3	3	4	4	4	3	4	5	5	1	2	1	2	2	1	1	2	3	3	1	1	5	4	4	1	2	2	2	4	1	1	1	2	4	3
5	5	5	5	3	4	4	4	4	4	4	4	5	5	4	3	2	3	4	3	3	1	1	4	1	3	1	1	1	2	2	2	2	2	3	2	2	3	2	2	3	3	2	2	2	2	2	1	1	1
4	3	4	1	3	4	5	5	4	4	4	3	4	4	5	1	2	3	3	3	4	2	2	2	2	2	2	2	2	1	2	2	9	4	2	2	2	3	1	1	2	2	3	4	3	2	2	1	5	4
5	4	4	4	5	5	4	3	5	5	5	5	4	3	3	4	4	5	9	4	3	3	3	3	1	1	1	1	1	1	1	1	3	4	3	1	1	2	2	3	3	2	2	4	2	2	1	2	3	2
3	3	3	3	4	5	5	5	4	4	3	4	4	4	3	2	3	3	3	3	3	1	1	1	1	1	1	1	1	1	1	1	1	1	1	1	1	1	2	3	2	2	2	2	2	4	3	3	4	3
4	3	3	2	3	4	4	4	3	4	4	3	3	3	3	3	3	4	4	3	3	1	1	3	1	5	1	1	1	1	1	5	1	1	5	1	1	1	1	1	4	4	4	9	4	4	4	1	3	3
3	3	2	2	4	4	5	5	4	5	5	4	5	5	3	2	3	3	4	3	4	3	3	2	1	2	1	1	1	1	1	1	1	2	1	1	1	1	1	1	3	2	3	4	4	2	2	2	3	4
5	5	4	2	4	4	5	5	4	3	4	3	4	4	3	3	3	5	5	3	3	1	1	3	1	3	1	1	1	1	1	3	1	1	1	1	1	1	2	2	3	4	4	3	3	3	2	3	3	4
4	4	3	2	3	4	5	4	4	3	4	3	4	4	3	2	2	3	4	3	3	1	1	5	1	3	1	1	1	1	2	2	2	3	5	1	2	2	2	2	2	2	2	2	2	2	2	2	4	3
4	4	3	3	5	4	5	5	3	4	5	5	4	4	4	2	2	3	3	5	3	2	2	3	1	1	1	1	1	1	1	4	1	4	4	1	1	3	1	1	2	2	2	5	2	3	2	1	3	2
5	5	4	3	3	4	5	5	5	4	3	3	4	4	3	3	3	4	3	2	2	2	2	2	1	5	1	1	1	1	1	1	2	3	1	1	1	3	2	2	2	2	2	1	2	2	2	3	4	2
3	3	3	1	3	5	5	5	4	4	4	3	3	4	4	3	3	4	3	3	3	5	5	3	3	3	3	2	1	1	2	2	3	3	4	1	1	1	2	1	2	2	2	2	2	2	1	2	4	2
4	4	3	2	3	3	3	3	4	4	3	3	4	4	3	3	3	4	5	3	4	3	4	3	2	2	2	2	2	3	2	2	2	4	3	2	3	3	2	2	2	2	3	3	2	2	2	2	3	3
5	5	5	2	2	4	4	3	4	2	3	3	3	4	4	3	3	5	3	4	5	4	4	3	2	3	2	2	2	2	2	3	3	4	3	1	1	2	2	1	3	2	2	3	2	1	1	2	5	8
4	4	5	4	3	4	4	4	4	5	4	4	5	4	4	2	3	4	4	4	4	2	2	3	2	2	2	2	3	1	2	3	2	3	3	1	2	2	2	2	2	2	2	3	2	2	1	2	3	2
4	5	5	3	4	4	5	5	5	3	4	4	5	3	4	2	3	4	4	3	4	1	1	2	1	2	1	1	1	1	3	2	1	2	4	1	1	1	1	1	3	2	2	3	2	4	1	1	3	5
4	4	3	4	3	5	5	4	4	4	4	4	4	4	2	2	2	4	4	4	4	4	4	3	1	1	1	2	3	1	9	2	3	4	3	1	2	3	1	2	2	2	8	5	2	1	2	2	2	3
4	3	2	2	3	4	5	5	4	3	4	4	4	4	3	1	2	4	4	3	4	3	3	4	2	1	2	1	2	2	3	3	1	3	3	1	1	1	2	1	2	1	8	5	4	3	2	1	3	3
4	4	3	2	4	4	5	5	5	3	3	4	4	4	3	3	3	4	4	2	2	1	1	4	1	2	1	2	3	1	1	5	1	1	2	1	1	1	2	2	4	2	2	4	4	2	1	2	4	4
3	2	2	2	4	4	4	3	4	4	4	4	3	3	3	3	3	4	3	2	2	4	5	4	2	3	4	5	5	1	2	4	1	5	5	1	1	2	1	2	2	2	2	3	2	2	2	1	2	1
4	4	4	3	5	4	5	3	5	4	3	4	4	4	3	2	3	4	3	3	4	1	1	2	1	2	3	1	1	1	3	1	1	3	4	1	1	2	2	3	2	2	2	4	3	2	1	3	4	3
3	2	5	3	4	3	2	2	4	2	3	2	4	2	2	2	3	2	5	3	2	3	4	2	1	1	1	3	2	1	1	3	3	5	2	1	3	4	3	2	5	2	2	2	2	3	2	2	3	3
4	3	3	1	4	4	4	4	4	3	4	4	4	3	5	2	3	4	3	4	5	3	3	4	2	3	1	3	4	1	2	3	3	3	3	1	2	2	2	2	4	2	3	4	4	1	1	1	3	4
4	4	4	3	3	4	4	3	4	4	3	4	4	5	3	3	3	4	4	4	3	3	3	5	1	2	1	2	2	1	2	2	1	2	4	1	1	2	2	2	2	2	3	3	3	2	1	2	4	2
5	4	4	4	4	4	4	4	4	4	4	4	3	4	3	4	3	2	3	3	3	2	2	3	3	2	2	3	1	1	1	3	2	3	3	1	1	2	2	2	2	2	2	3	2	1	1	2	5	2
5	4	4	3	3	3	4	4	4	4	4	4	4	4	3	2	3	4	4	3	3	2	2	2	2	2	2	2	2	2	2	2	2	2	3	2	2	2	2	2	3	3	2	1	3	3	2	1	3	2
3	3	4	4	4	4	4	4	4	5	4	5	4	4	3	3	3	4	2	3	3	4	4	3	1	2	1	1	1	1	1	3	3	4	3	1	2	3	2	2	2	2	2	2	3	2	2	1	2	4
4	3	2	2	3	3	3	5	4	4	3	3	4	4	3	3	2	4	3	3	3	1	1	2	1	3	1	2	2	1	3	3	2	3	4	1	2	4	2	2	3	2	2	2	3	2	2	4	4	3
5	5	5	2	3	3	5	4	4	5	4	3	4	4	3	3	3	2	2	3	3	4	3	3	1	2	1	1	1	1	1	1	1	1	4	1	1	1	4	3	3	3	1	5	3	1	1	3	4	5
4	4	3	1	2	3	5	4	4	2	3	4	3	4	5	2	3	4	4	5	5	5	5	4	2	5	2	2	5	1	2	3	2	5	4	1	1	4	1	2	2	2	2	4	3	2	1	2	5	4
4	4	4	4	4	4	3	3	3	4	4	4	2	2	4	2	5	4	3	3	4	3	3	3	2	1	1	4	2	2	3	2	3	4	2	3	2	2	3	3	2	2	2	2	3	2	2	3	3	4
5	5	5	3	4	3	4	5	4	4	4	4	4	4	3	2	2	3	2	3	4	3	4	2	2	3	2	2	2	2	2	2	2	3	2	2	2	2	1	2	2	2	2	2	2	1	2	2	3	3
4	2	2	1	3	1	4	4	3	4	3	3	4	4	9	1	2	3	2	4	4	2	2	1	1	4	3	1	1	1	1	3	3	5	4	1	1	1	2	3	5	5	3	3	5	4	1	4	4	3
5	4	4	3	3	4	5	5	5	5	5	5	4	5	3	3	3	3	4	3	3	3	3	5	2	3	3	3	3	1	4	2	2	9	4	1	1	1	2	2	2	2	1	2	2	1	1	2	2	2
4	4	5	3	5	4	5	3	5	5	5	4	4	5	3	2	1	5	4	4	5	3	2	3	1	2	1	1	3	1	2	2	3	3	4	1	3	4	1	1	2	2	2	3	2	3	2	2	4	4
3	3	3	3	3	3	4	4	3	3	4	3	3	3	4	4	3	5	5	4	4	4	4	4	2	3	1	2	5	1	2	4	3	3	5	2	2	4	2	2	3	3	3	1	2	1	2	3	3	3
5	5	5	4	4	4	4	4	4	3	4	4	4	4	4	4	2	4	4	3	3	2	3	3	2	2	1	1	1	1	1	4	5	4	3	1	1	1	2	1	4	1	1	4	2	2	3	1	4	3
4	4	3	3	3	3	4	4	4	4	3	3	4	4	3	2	2	3	3	3	3	3	3	5	4	3	3	4	4	1	1	4	1	1	4	1	1	1	2	2	2	2	2	2	2	1	1	2	3	3
4	3	4	3	4	3	4	3	4	4	4	4	4	4	3	3	3	3	3	3	4	3	3	3	3	2	2	4	3	3	3	2	2	2	2	2	2	3	2	2	2	2	2	3	2	2	2	2	2	2
2	3	2	1	3	2	4	3	4	4	4	3	4	5	3	4	3	2	3	2	4	3	3	4	9	2	3	2	2	2	2	3	3	2	4	3	3	3	2	2	3	1	2	2	3	1	2	4	3	3
5	5	5	3	3	3	3	4	4	4	3	3	4	3	2	2	2	3	3	3	3	3	4	2	2	2	2	2	3	2	3	2	3	3	4	2	2	2	1	1	4	4	4	4	8	2	2	1	2	1
5	3	4	2	3	3	4	4	4	4	3	3	3	4	5	3	3	5	4	4	3	3	4	4	1	2	3	1	2	1	3	3	4	5	5	1	2	4	3	1	2	2	2	4	2	1	1	1	5	3
3	4	5	3	5	4	5	5	5	5	5	5	5	4	3	2	3	3	2	2	4	3	3	2	1	2	1	1	1	1	2	2	3	3	3	1	1	3	2	2	2	2	2	2	3	1	1	1	4	3
3	2	2	2	4	4	5	5	4	5	4	5	3	3	4	2	3	4	5	4	5	3	4	4	3	1	2	2	1	3	3	1	2	4	2	1	1	1	1	1	2	3	3	5	4	2	2	2	2	3
3	3	9	2	4	4	5	4	4	4	4	4	3	3	3	3	3	5	3	2	4	3	3	3	3	3	3	3	3	1	8	4	4	3	3	1	1	4	2	2	2	2	2	2	2	2	2	2	3	3
3	2	1	1	3	3	4	4	3	4	4	4	3	3	3	3	3	3	2	3	1	4	4	3	1	3	1	1	2	2	1	1	3	5	3	1	3	5	2	2	2	2	2	3	2	2	2	1	4	1
3	3	3	3	3	3	4	4	3	4	4	4	3	3	3	3	3	4	4	4	4	3	3	3	3	3	3	3	3	2	2	2	2	3	2	2	2	2	4	2	2	2	4	4	2	2	2	1	4	4
5	5	5	4	5	5	5	5	5	5	4	4	4	4	4	2	2	3	3	3	4	1	1	4	1	2	1	2	2	1	1	4	1	3	3	1	1	1	3	3	3	3	2	2	2	1	2	1	2	2
5	5	4	5	5	4	5	5	4	3	4	4	4	4	3	2	3	3	4	3	3	3	3	3	2	1	1	2	3	2	2	3	3	3	3	1	2	2	2	2	3	2	1	2	2	1	2	1	3	2
5	5	3	3	5	5	5	5	5	5	5	5	5	5	2	2	2	2	3	2	2	3	3	3	1	2	1	9	1	1	2	2	1	2	3	1	1	1	2	1	4	2	4	5	3	4	4	1	2	1
3	3	3	2	4	3	5	3	4	4	3	3	9	4	3	3	3	3	3	3	5	3	2	5	2	5	2	5	3	2	2	5	3	5	5	3	2	5	2	2	2	1	1	2	2	2	1	2	2	3
4	4	5	2	3	3	4	3	5	5	3	4	5	5	4	2	2	4	3	5	5	4	3	4	3	2	3	4	4	1	3	4	2	3	4	2	3	1	2	2	2	2	2	3	2	2	2	2	1	3
4	4	4	3	5	5	5	5	5	5	5	5	5	5	3	3	3	5	4	3	4	3	3	3	3	3	3	1	1	1	1	1	1	2	3	1	1	1	2	1	2	2	2	1	2	2	2	2	3	3
4	4	4	5	4	3	5	4	5	4	3	3	4	4	3	3	3	3	3	2	3	3	3	3	1	3	2	3	2	1	1	2	1	2	1	1	1	1	4	2	2	3	3	4	2	2	1	2	5	3
4	4	3	1	3	4	4	4	4	2	3	4	4	4	3	3	3	4	9	4	2	4	4	5	1	2	3	1	3	1	1	1	4	5	1	1	3	4	2	2	2	2	2	2	2	2	2	1	4	4
5	4	4	3	4	3	4	3	4	4	4	4	5	4	3	3	3	4	3	5	5	1	1	5	1	4	1	2	2	1	1	3	4	5	5	2	2	4	2	2	3	2	2	2	2	2	2	2	5	3
4	4	3	3	3	4	4	4	4	4	5	4	5	3	4	3	3	4	4	3	4	3	3	4	1	1	2	1	3	1	1	2	2	3	4	1	1	2	2	2	3	2	2	3	3	3	2	2	3	3
4	4	5	2	4	4	5	4	5	3	4	4	4	4	3	3	3	3	4	3	3	4	4	2	2	2	1	2	2	1	1	3	3	3	3	1	1	2	2	1	2	2	2	2	2	2	2	2	4	3
3	2	3	1	3	5	5	5	4	4	4	5	3	5	4	3	3	4	4	4	4	4	3	4	2	2	3	1	1	1	2	3	1	4	4	1	1	1	2	2	3	2	4	4	2	8	5	1	3	4
3	3	5	2	3	4	4	4	4	4	4	5	5	5	3	2	2	4	3	3	4	1	1	2	1	2	9	1	1	1	2	1	2	2	1	1	1	1	2	1	4	4	4	4	4	4	4	1	4	4
5	5	5	3	4	4	4	4	4	4	5	3	5	4	9	2	2	3	3	2	2	9	9	4	1	4	1	2	2	2	1	3	2	4	4	1	2	3	2	2	3	2	3	2	2	2	2	2	2	2
4	4	3	2	2	3	4	4	4	5	3	4	5	5	3	3	4	3	4	3	5	2	2	4	4	4	1	4	1	2	2	4	4	4	4	1	1	4	2	2	2	1	1	2	3	1	1	2	4	2
4	3	4	2	4	3	5	5	5	4	4	4	4	4	3	2	3	3	2	3	3	2	2	3	2	2	3	2	3	1	2	3	2	2	4	1	1	3	1	1	2	2	2	1	2	1	2	1	5	5
5	5	5	4	4	4	3	4	8	5	4	3	4	5	8	3	3	4	3	8	3	1	8	3	3	3	3	4	4	3	4	3	4	8	5	2	3	4	2	2	2	2	5	8	8	4	4	8	3	4
4	4	5	4	3	4	5	5	5	4	4	5	5	4	3	2	3	4	3	4	4	4	4	4	2	2	1	1	1	1	2	1	2	3	3	1	1	2	2	2	2	2	2	2	2	2	2	2	4	3
4	4	5	4	4	3	5	4	5	5	5	4	5	5	4	3	3	4	4	5	5	2	2	4	1	2	3	2	2	1	2	4	4	5	5	2	2	2	2	2	2	2	2	4	2	2	2	2	2	4
4	4	4	3	4	4	5	4	4	4	4	4	5	5	3	2	2	3	3	3	3	2	2	3	1	2	1	1	1	1	1	2	2	3	3	1	1	3	2	2	3	3	3	3	2	2	2	2	3	2
3	3	3	3	3	4	4	4	4	4	4	4	3	3	3	2	2	3	3	4	3	3	3	3	3	3	3	3	3	1	1	3	2	3	3	1	1	3	2	2	3	2	2	3	3	3	3	3	3	2
4	4	3	2	2	4	4	3	4	4	4	3	4	4	3	3	2	3	3	4	3	3	3	3	1	2	1	2	1	1	1	1	1	1	4	3	2	4	2	1	4	3	3	3	3	4	1	2	4	4
4	4	4	2	3	4	5	4	4	4	3	3	4	3	4	3	3	3	3	3	4	3	1	4	2	2	2	2	2	1	2	2	1	3	4	1	2	3	1	2	2	2	3	4	2	2	2	2	3	4
3	4	4	3	5	5	5	4	5	4	4	4	4	4	4	2	3	4	4	3	5	4	4	3	1	2	1	1	2	2	3	4	2	4	4	1	2	1	1	2	2	2	2	4	2	2	1	1	3	4
4	4	3	2	5	3	4	5	4	4	4	4	3	3	3	3	3	4	4	3	4	3	4	2	1	2	1	4	3	1	3	3	3	4	2	1	2	3	2	3	3	3	3	4	4	4	4	2	3	2
4	4	5	3	5	5	5	5	5	5	3	4	5	5	4	1	1	5	4	3	3	3	3	4	1	2	1	1	2	1	1	2	1	1	3	2	2	3	2	2	2	2	3	4	2	2	1	1	4	4
5	4	4	3	4	4	4	5	5	4	4	5	5	5	3	2	2	3	4	3	3	1	1	5	2	5	1	2	1	1	1	4	1	2	4	1	1	1	1	1	2	2	3	3	2	3	1	1	3	4
4	5	5	3	4	4	5	5	4	4	4	4	4	4	3	3	9	2	3	9	9	1	1	3	1	2	3	2	2	2	2	2	2	2	2	2	1	2	9	3	4	3	4	2	2	2	2	3	3	3
4	4	4	2	5	5	5	5	5	5	4	4	4	5	3	2	2	3	3	3	4	1	1	5	3	4	1	3	2	1	2	4	2	2	5	1	1	2	2	2	3	2	2	5	3	2	2	1	2	4
5	5	5	5	4	4	4	5	5	5	4	4	4	4	4	3	2	4	4	4	2	5	5	5	4	3	5	9	9	9	9	9	9	9	9	9	9	9	2	2	2	2	9	5	2	2	2	4	5	4
4	3	3	3	3	4	4	4	4	3	3	3	3	4	3	3	4	3	3	4	3	2	4	2	2	1	1	2	1	1	1	3	2	3	3	2	2	4	1	2	3	2	2	3	4	3	2	4	5	5
4	4	4	2	3	3	4	3	4	3	4	4	4	4	2	1	1	5	4	3	3	1	1	8	1	2	1	1	1	1	1	1	4	4	5	1	1	1	2	2	3	3	3	3	2	2	2	4	5	5
5	5	5	5	5	4	5	5	5	5	5	5	5	5	5	1	1	4	4	4	4	4	5	5	4	4	5	2	2	2	3	3	3	4	5	3	3	3	2	2	2	3	3	2	9	2	2	9	9	9
5	4	4	4	5	5	5	5	5	3	4	4	5	5	3	2	2	2	8	3	2	3	3	3	1	2	1	1	1	1	1	2	2	4	3	1	2	3	1	1	2	2	2	9	2	2	2	3	3	3
3	2	2	1	3	4	5	5	3	4	5	4	4	4	3	2	2	3	3	3	3	4	4	4	1	2	1	1	2	1	4	1	3	4	2	1	3	4	3	2	2	2	3	4	3	3	2	2	3	3
4	5	5	4	5	4	5	4	5	5	5	5	5	5	3	3	2	3	3	3	4	3	3	9	2	2	1	1	1	1	1	2	1	2	4	1	1	2	2	2	3	2	2	4	3	2	1	2	2	2
3	3	3	2	4	3	4	5	5	5	5	5	5	5	3	2	3	5	3	4	3	1	2	4	2	3	2	3	2	2	1	2	2	2	4	2	2	3	2	2	2	3	3	3	3	3	2	2	3	2
4	4	4	3	4	4	5	4	4	4	4	4	9	3	3	3	3	4	5	4	4	2	2	4	2	2	1	1	5	1	1	3	3	5	5	1	1	5	2	2	4	4	2	4	4	1	1	1	5	4
3	4	2	3	4	4	5	5	5	5	5	5	4	4	2	2	2	2	2	2	3	3	2	3	1	4	1	2	2	1	3	2	1	4	4	2	4	3	2	2	3	2	2	3	3	2	2	2	2	2
5	3	3	3	5	4	5	4	5	4	4	5	5	5	3	1	1	3	4	3	5	4	3	5	1	2	2	1	2	1	1	1	1	3	1	1	1	3	4	2	3	2	4	5	2	1	2	3	1	4
4	5	3	2	3	4	5	4	5	4	4	3	4	4	3	2	3	3	3	4	3	1	3	4	2	3	3	3	1	1	4	4	3	3	4	1	2	1	3	3	2	2	2	3	2	2	2	2	4	3
4	4	3	3	3	3	4	4	4	4	3	4	4	4	3	3	3	4	3	3	4	5	5	3	2	2	2	3	2	1	3	4	4	4	3	1	2	1	2	2	2	3	2	2	3	3	2	2	4	3
4	3	4	2	4	4	5	5	5	5	4	4	5	4	2	1	1	3	3	3	3	3	3	4	3	1	4	1	1	1	4	2	3	4	1	1	1	2	2	2	2	2	2	2	2	2	2	1	4	2
1	1	1	1	3	4	5	4	3	4	4	3	3	3	3	3	3	3	4	2	2	3	3	3	3	2	5	2	3	1	4	5	3	5	4	1	2	5	1	2	2	2	2	1	2	2	1	2	4	3
4	5	5	4	4	3	4	4	5	5	5	5	5	5	3	2	1	3	3	3	2	3	4	3	1	2	1	2	1	1	1	2	2	2	1	1	1	3	2	3	3	2	3	2	3	3	1	2	3	3
4	4	5	4	5	4	5	4	4	4	4	4	3	3	5	3	4	4	4	4	4	1	1	4	3	4	3	4	3	1	4	5	3	4	4	1	1	4	1	2	2	2	2	4	2	2	1	2	2	2
5	5	3	3	5	5	5	5	5	4	4	5	4	5	3	2	2	3	3	4	4	2	2	4	2	2	2	1	1	1	2	4	3	3	5	3	1	1	2	2	2	2	2	4	4	2	2	2	4	4
5	5	5	5	4	4	5	4	5	5	4	4	3	3	3	3	4	3	3	3	4	3	3	4	1	4	1	1	2	1	1	1	2	4	4	1	2	2	4	2	3	3	2	3	2	3	4	2	4	2
5	5	5	3	3	3	4	4	5	5	3	4	5	4	3	1	1	3	2	3	3	4	4	3	1	1	1	1	1	1	3	4	4	3	3	1	1	3	1	2	2	2	2	2	2	2	2	3	3	3
5	5	5	4	4	5	5	4	4	3	3	3	3	3	3	2	3	3	4	3	2	2	2	4	1	2	1	1	2	1	2	1	2	2	3	1	3	2	2	2	2	2	2	2	4	4	3	3	4	4
3	3	3	3	4	4	5	4	4	4	4	4	5	4	3	2	2	3	4	2	2	4	4	3	2	2	2	4	2	1	1	5	4	4	4	1	3	3	2	2	2	2	2	3	2	3	2	1	2	3
5	2	4	1	4	4	5	5	5	5	5	4	4	4	4	2	2	3	3	3	3	2	2	2	3	3	1	1	1	1	1	2	3	2	3	1	1	1	1	1	3	3	2	3	2	1	1	3	4	5
5	4	5	4	5	4	4	4	5	5	4	4	4	4	4	1	2	4	3	2	2	3	3	2	1	1	1	1	1	1	1	1	1	2	4	1	1	1	2	2	4	4	2	2	4	3	2	2	4	3
4	4	4	2	3	4	5	4	4	5	4	3	4	4	3	1	2	2	3	3	3	1	1	3	1	2	1	1	3	1	1	3	3	2	4	1	2	2	2	2	2	2	2	2	2	3	2	1	5	3
4	4	3	2	4	4	4	4	4	5	3	5	5	5	3	2	1	9	3	3	2	3	3	3	1	4	1	2	2	1	2	3	3	3	4	2	3	3	1	2	2	2	2	2	3	2	2	2	3	3
4	3	3	3	4	5	5	5	4	4	4	4	4	4	3	3	3	3	3	3	4	2	2	5	2	5	2	4	4	1	1	5	3	4	5	1	1	1	2	2	3	2	2	2	3	2	2	3	3	3
4	3	4	2	5	4	5	5	5	5	4	4	5	4	3	2	3	3	2	4	4	2	2	4	2	3	2	2	1	1	1	4	3	4	4	1	1	2	2	2	2	2	2	2	2	2	1	1	2	3
4	3	3	3	4	4	4	4	4	4	4	3	3	3	3	2	2	3	3	3	3	3	3	5	4	4	2	4	2	1	2	4	2	4	4	1	1	2	2	2	2	2	2	2	2	2	2	3	3	3
5	4	3	3	3	4	4	4	3	3	4	4	4	5	4	4	1	3	2	5	5	4	4	5	1	4	1	4	4	1	1	1	1	4	4	1	4	3	2	2	4	3	3	3	2	2	1	3	3	2
5	5	5	3	5	4	5	5	5	5	3	4	5	5	3	3	3	3	3	3	3	3	3	3	1	2	1	1	1	1	1	3	1	3	3	1	1	1	2	2	3	2	2	2	2	2	2	2	3	4
4	4	5	4	5	5	5	5	5	5	5	5	5	5	3	3	1	3	4	3	3	1	3	3	1	3	1	1	3	1	1	3	3	3	3	1	3	1	2	2	2	2	3	3	4	4	2	1	3	2
4	4	4	4	4	4	4	3	5	4	4	4	4	4	1	1	2	4	3	2	3	3	3	3	3	3	3	3	3	3	3	3	3	3	3	3	3	3	2	2	2	2	2	2	2	2	2	8	9	2
3	4	3	2	5	4	5	4	4	5	5	5	4	4	3	2	1	3	4	3	3	3	3	2	1	2	1	2	2	1	1	2	2	2	1	1	1	1	3	2	3	3	3	4	3	4	2	2	3	4
3	3	2	2	3	4	5	5	4	4	4	4	4	5	3	2	4	3	3	3	2	1	1	4	1	3	2	1	2	1	1	1	3	3	1	1	1	1	4	3	4	4	4	5	4	3	3	2	4	2
3	3	3	3	4	5	5	5	5	5	4	4	4	4	4	3	3	3	3	2	4	4	4	3	1	1	1	1	1	1	1	1	2	2	1	1	1	1	3	2	4	3	4	5	3	2	2	2	4	4
5	5	5	4	4	3	4	4	5	4	3	3	5	5	3	2	1	4	4	3	3	3	4	4	2	4	1	2	2	1	3	4	1	3	4	1	1	1	2	3	4	2	2	4	4	1	1	2	4	5
5	5	4	3	5	5	5	5	5	5	5	5	5	5	3	2	3	4	3	3	2	3	3	2	1	2	1	1	1	1	2	2	1	2	5	1	1	4	2	2	2	2	1	1	3	2	2	3	3	3
5	5	5	5	4	4	5	4	5	5	5	3	4	4	3	2	2	4	3	3	3	4	4	5	2	2	4	1	3	1	1	4	2	4	4	1	1	3	3	2	2	2	2	2	2	1	1	2	2	2
4	4	8	8	4	4	4	4	5	5	8	4	5	5	9	2	2	4	4	8	4	4	4	3	2	3	3	2	3	1	4	5	4	4	5	2	3	4	2	2	2	2	2	3	2	2	2	3	3	3
5	5	5	3	5	4	4	4	5	4	4	5	5	5	5	2	3	3	4	3	2	4	5	5	1	3	2	2	3	1	4	1	3	4	5	1	4	1	2	2	2	2	2	3	2	2	2	1	3	1
5	4	4	3	4	4	4	4	5	5	4	4	4	4	3	1	3	4	3	4	4	3	3	5	2	2	2	2	2	2	2	3	2	2	5	2	2	1	2	2	2	2	1	9	2	2	1	4	4	2
4	4	5	4	5	5	5	5	5	5	4	5	4	5	3	1	2	3	3	3	4	3	3	5	1	2	1	1	3	1	1	4	3	3	5	3	3	4	2	2	9	2	2	3	2	2	2	2	2	3
4	4	5	3	4	4	4	5	5	5	5	4	4	3	3	1	3	5	5	3	4	4	3	3	1	1	1	4	3	1	3	4	4	4	5	2	2	3	2	2	2	2	2	4	2	3	3	2	1	1
4	3	4	2	4	5	5	4	5	4	4	5	4	4	4	2	3	3	2	4	5	2	2	4	1	4	1	2	1	1	3	5	4	4	3	1	1	3	1	1	3	3	3	3	3	2	2	2	3	3
4	4	3	3	3	5	5	5	4	4	3	4	4	4	3	2	2	3	3	2	3	3	3	4	2	2	2	3	2	2	2	3	3	3	4	2	2	2	1	1	2	2	4	5	2	4	1	2	3	2
5	5	4	4	4	4	5	5	5	4	4	4	4	4	3	2	3	4	3	2	3	3	4	4	2	3	3	1	1	1	3	2	3	4	3	1	3	3	2	2	2	2	2	2	2	2	2	2	2	3
5	4	3	3	4	3	4	4	5	4	4	4	3	3	3	3	3	3	4	4	4	3	3	2	2	2	2	2	2	2	2	1	1	1	2	1	3	2	2	2	4	3	4	4	3	4	4	3	4	4
5	5	4	4	4	3	4	5	3	4	4	4	4	4	4	2	2	3	3	3	4	3	3	4	2	2	2	1	1	1	2	3	2	2	3	2	2	2	2	2	3	2	2	1	3	3	2	2	3	3
5	5	5	5	4	3	5	5	4	4	3	3	4	4	3	3	2	3	5	5	5	4	4	5	2	2	2	3	3	1	1	2	2	4	4	1	3	3	2	2	2	2	3	3	2	1	1	3	3	4
5	5	4	4	5	5	5	5	5	5	4	4	5	4	3	2	2	4	4	3	4	4	4	3	2	2	2	2	2	2	2	2	2	3	2	2	3	3	2	2	2	2	2	2	2	2	2	2	3	3
5	4	4	4	5	5	5	5	5	5	5	5	5	5	3	3	3	4	3	4	4	3	3	3	1	2	1	1	1	1	1	2	2	2	4	1	1	2	2	3	3	3	2	3	4	4	3	2	3	3
5	4	5	4	4	5	4	4	4	4	5	4	4	3	3	2	2	4	4	4	4	3	3	4	4	2	1	3	3	1	3	4	3	3	4	2	3	2	2	2	2	2	2	2	2	2	2	2	2	3
4	4	4	4	4	4	5	4	4	3	3	4	4	4	3	1	2	4	4	2	2	2	2	2	1	3	4	1	2	1	4	4	3	4	4	1	1	3	2	2	2	2	2	2	2	1	2	3	4	3
5	9	5	3	4	5	4	5	5	5	5	5	5	5	3	2	2	3	3	3	4	2	2	4	2	2	2	2	2	1	3	2	3	3	4	1	3	4	2	1	3	2	1	3	3	1	2	2	3	2
4	4	4	3	5	4	4	4	5	5	4	4	5	5	3	2	2	3	3	3	3	1	3	3	1	2	1	1	3	1	3	3	3	4	5	2	3	3	1	2	3	3	2	2	3	2	2	1	2	2
3	4	4	3	4	4	4	4	4	3	3	4	4	4	3	3	3	4	4	3	2	4	4	4	2	2	2	3	3	2	3	3	3	3	2	2	3	3	2	2	2	2	2	2	3	2	2	2	3	3
3	2	2	2	3	4	5	5	4	5	4	4	4	4	3	3	2	3	3	4	4	4	4	4	3	2	1	1	3	1	4	2	3	4	4	1	5	4	3	2	2	2	3	4	2	2	2	2	3	4
3	3	2	2	3	5	5	5	5	5	4	5	4	4	4	2	2	3	3	3	4	2	2	3	2	2	3	3	2	1	1	3	3	3	3	1	1	2	1	1	3	3	2	5	3	2	2	2	4	3
4	4	8	2	5	5	5	5	4	4	4	5	4	4	8	3	2	3	3	3	2	3	3	4	2	3	2	4	3	2	2	4	3	3	4	1	2	1	2	3	4	3	3	3	4	8	2	3	2	2
5	5	4	5	4	3	5	4	5	5	4	4	5	5	5	4	3	3	3	4	5	4	5	5	2	2	2	2	5	2	3	2	2	4	5	2	2	2	1	2	2	2	1	2	2	1	1	1	3	2
5	5	5	4	5	5	5	5	4	4	5	5	5	3	4	1	2	4	3	4	5	2	2	3	1	1	1	1	1	1	3	3	2	3	4	1	3	3	2	2	2	3	2	5	3	2	2	2	4	2
4	4	3	3	4	3	5	4	5	5	5	5	5	3	3	3	3	4	4	4	4	3	3	3	1	1	3	1	1	1	4	4	4	4	4	1	2	2	2	2	2	2	2	3	2	2	1	3	4	4
4	4	4	2	3	4	5	5	5	5	4	5	5	5	4	3	2	4	3	2	4	4	4	4	1	1	1	3	2	1	1	2	2	3	2	1	2	1	1	2	4	4	4	4	4	4	1	2	4	1
5	5	4	4	3	5	4	4	5	4	4	4	4	5	3	1	3	2	4	3	1	3	3	3	2	2	3	3	3	1	2	2	3	3	3	1	2	2	2	2	2	2	2	3	2	2	2	2	3	3
4	4	4	3	4	4	4	3	3	4	4	4	5	5	2	2	2	3	3	2	2	3	3	3	3	2	2	3	4	3	3	4	3	4	2	2	2	2	1	2	2	2	2	2	2	2	2	2	4	3
5	4	4	3	4	4	5	4	5	4	4	4	3	4	3	2	2	4	3	3	3	2	2	3	1	3	2	3	2	2	2	2	3	3	3	2	2	3	2	2	2	2	2	2	2	2	2	3	5	2
5	4	3	3	5	5	5	4	4	4	3	4	3	5	3	2	3	4	5	2	4	3	3	4	2	2	1	1	1	1	1	2	2	4	4	1	2	1	2	2	4	3	4	4	2	4	1	2	3	4
5	4	3	2	5	4	4	4	5	4	3	4	3	4	3	2	2	3	4	3	3	3	3	3	2	2	1	2	1	1	1	5	2	4	5	1	1	2	2	2	2	2	2	5	2	3	3	2	3	4
5	4	4	4	3	4	4	4	4	4	4	4	5	3	4	3	3	4	3	3	3	2	2	2	2	2	2	2	2	2	2	3	2	2	1	1	2	3	1	1	4	4	3	2	4	3	2	2	4	4
4	4	4	3	4	4	5	5	4	4	4	4	5	4	3	2	2	3	3	2	2	4	3	3	2	1	1	1	1	1	2	1	2	2	1	2	3	3	1	2	4	4	3	3	3	3	3	3	3	2
5	4	5	2	3	2	3	4	4	3	2	3	3	4	3	3	2	5	4	4	3	4	4	4	1	4	3	1	3	1	2	3	4	4	5	2	2	4	2	2	3	2	2	4	2	3	3	3	4	4
5	5	5	9	5	5	5	5	5	5	3	3	5	5	3	3	2	3	3	3	3	3	3	5	2	3	2	2	9	2	3	2	2	3	5	2	2	2	2	2	2	3	2	4	2	2	2	2	3	2
5	5	5	5	4	4	5	4	5	5	5	5	5	5	3	3	3	3	3	3	3	3	3	3	1	2	2	1	2	1	2	1	3	3	4	1	2	2	2	2	2	2	2	2	2	2	2	3	3	3
5	3	3	2	5	4	4	5	5	4	4	4	5	4	3	1	3	2	3	3	4	2	3	4	1	2	2	1	4	1	3	2	2	4	5	1	3	3	2	2	4	4	2	1	4	2	1	1	2	3
4	5	4	3	3	5	5	5	4	4	4	4	4	4	3	3	1	3	2	2	3	2	2	4	2	2	2	2	2	2	2	2	2	3	4	2	2	2	2	2	2	2	4	5	3	2	2	2	2	2
4	4	4	3	3	4	4	4	5	5	4	4	5	4	3	2	2	4	3	2	2	4	4	3	1	2	2	1	1	1	2	2	3	3	2	1	2	2	2	2	4	3	2	4	4	3	2	3	3	2
4	4	4	4	5	5	5	5	4	4	4	3	5	4	3	2	2	2	4	3	2	3	9	9	1	1	2	2	1	1	3	3	3	3	1	1	1	2	2	3	4	2	1	2	3	4	3	4	3	4
3	3	4	3	4	4	5	5	5	5	5	5	4	4	4	3	3	3	3	3	4	4	4	3	2	3	2	1	2	1	4	2	3	4	3	1	2	2	2	2	2	2	2	3	2	2	2	2	4	3
5	4	3	2	5	4	5	5	5	4	4	5	5	4	3	3	4	3	4	4	2	3	3	5	2	3	1	2	4	4	1	4	3	3	5	3	1	3	1	1	2	2	3	5	2	2	1	2	2	2
4	4	4	3	5	5	5	5	4	4	4	4	3	3	3	2	3	4	3	2	4	4	4	4	2	3	2	3	2	2	2	4	4	4	4	1	1	3	2	2	2	2	2	3	2	2	1	1	2	2
5	4	4	3	4	3	5	5	5	3	4	3	4	4	3	3	3	4	4	2	4	3	3	4	3	2	3	1	1	2	3	4	1	3	4	1	1	4	2	3	4	2	4	2	4	2	1	4	4	3
5	4	5	5	4	3	4	3	5	4	5	5	5	5	3	3	2	4	1	4	4	1	1	4	2	4	1	1	2	1	1	1	1	3	5	1	1	1	4	3	2	2	4	4	3	3	2	3	3	3
5	5	5	2	5	5	5	5	4	4	5	4	4	4	3	3	3	3	4	3	3	3	3	4	3	4	2	3	2	1	1	3	1	3	4	1	1	1	2	2	2	2	2	2	2	3	2	2	3	3
3	3	4	2	4	5	5	5	4	4	4	4	4	5	3	3	3	4	3	3	4	4	4	2	2	2	2	2	2	2	4	5	2	4	4	1	1	1	2	2	2	2	2	4	3	2	2	2	4	4
4	4	4	4	5	4	4	4	4	3	4	4	4	3	3	3	3	3	3	2	2	2	2	5	4	4	2	3	4	1	3	4	3	3	5	1	2	3	2	2	3	2	3	2	2	8	2	1	2	3
4	4	3	2	3	4	5	5	4	4	4	4	4	3	3	1	1	3	3	3	3	4	4	3	1	3	2	2	3	2	2	2	2	4	3	3	3	2	4	2	4	2	2	4	2	2	2	2	2	2
4	4	4	4	3	4	3	3	4	4	4	4	4	4	4	4	4	4	4	4	4	3	3	3	1	3	3	3	1	1	2	3	3	3	5	1	5	5	3	3	3	2	2	2	2	2	2	3	4	3
5	3	3	3	4	5	5	4	4	5	5	4	4	3	3	2	2	3	3	2	2	3	3	3	3	5	3	2	4	1	1	5	1	1	5	1	1	1	2	2	2	2	2	2	3	2	2	2	3	4
3	3	9	2	3	5	5	5	4	5	4	4	4	5	4	3	3	3	3	3	3	3	3	4	4	3	2	4	4	2	3	4	4	4	4	2	3	4	1	2	4	4	4	8	2	1	1	2	2	1
5	5	5	4	5	5	5	5	4	4	3	4	4	4	3	2	2	3	3	2	2	1	1	4	1	4	4	1	4	1	3	4	2	2	4	1	2	4	1	1	3	3	4	4	4	2	2	2	2	2
4	5	5	4	3	4	5	5	4	5	4	4	5	4	3	2	2	8	3	2	4	3	3	4	1	3	1	2	2	2	3	4	3	4	4	1	1	2	2	2	3	2	2	3	2	2	1	1	3	2
4	4	4	3	3	3	4	4	4	4	4	4	4	4	3	3	3	4	4	4	2	3	3	4	1	2	2	1	3	1	1	3	3	3	3	2	3	3	2	2	3	2	3	3	2	2	2	3	3	3
4	3	2	2	3	4	4	3	4	4	4	4	4	4	3	2	2	5	4	3	3	3	4	4	1	3	3	3	3	1	2	5	9	3	5	3	4	4	2	2	2	2	2	4	3	3	1	2	3	4
4	5	4	4	4	3	5	4	5	5	5	4	5	4	3	1	1	2	2	3	3	3	4	3	1	2	2	2	2	1	3	2	2	3	3	1	2	3	3	2	2	2	3	2	2	1	1	1	4	3
5	5	5	1	5	5	5	5	5	5	4	5	5	4	3	3	2	4	4	3	4	3	3	4	2	3	1	1	1	1	1	3	3	4	4	1	1	2	2	2	2	2	1	2	2	2	1	3	3	4
5	5	9	9	4	4	4	4	5	4	4	4	4	4	3	2	3	3	4	3	3	1	1	4	3	2	2	3	2	1	3	3	3	3	4	3	2	3	2	3	4	3	3	3	3	3	3	3	3	3
5	3	3	1	3	4	4	4	4	4	3	3	3	3	3	2	3	4	5	3	3	3	3	4	2	2	3	3	3	2	3	2	3	3	4	2	2	3	2	3	4	3	3	4	3	3	2	3	4	2
5	5	5	4	5	5	5	5	5	4	5	5	4	5	4	2	1	1	2	3	4	4	4	4	1	2	3	1	2	2	1	2	3	4	3	1	2	3	1	2	2	2	2	2	2	2	2	1	3	4
5	5	4	3	5	5	5	4	5	4	4	4	4	4	3	3	2	3	2	3	4	3	3	4	1	3	1	3	3	1	3	3	1	2	4	1	1	3	2	2	4	2	8	5	4	5	4	2	3	3
5	4	4	3	4	3	4	3	5	4	4	4	5	5	3	3	2	4	5	4	5	4	4	3	2	5	5	1	3	1	4	4	3	4	5	2	2	4	2	2	2	2	3	2	3	2	1	2	3	4
5	5	4	2	4	3	5	4	4	3	4	4	4	3	4	3	3	5	5	4	5	3	3	3	1	2	1	1	2	2	3	3	3	3	3	1	2	4	4	4	5	4	3	4	2	2	3	3	3	4
5	5	5	4	3	3	4	5	4	4	5	4	5	4	3	3	3	4	5	2	4	3	3	4	2	2	2	3	2	2	2	3	2	2	4	2	2	1	2	3	3	2	2	2	2	2	2	2	3	4
4	4	4	3	4	4	5	4	4	3	4	4	3	4	3	2	2	3	4	3	3	2	2	4	1	3	2	3	3	1	1	3	3	4	4	1	1	2	2	2	4	4	4	2	4	3	1	3	4	4
4	4	4	3	3	3	5	4	4	4	4	4	4	5	3	2	2	4	4	3	4	3	3	4	3	3	3	4	4	1	3	4	3	4	5	2	2	2	1	2	3	2	2	2	2	3	1	2	4	4
5	4	3	4	4	5	4	3	5	5	4	5	4	4	3	2	2	5	4	3	4	1	1	4	1	1	2	1	1	1	2	4	2	5	5	1	1	2	2	2	4	4	4	3	4	2	1	4	4	3
5	5	4	2	3	4	4	4	4	4	4	4	4	5	3	3	3	3	2	2	4	3	3	3	1	3	2	2	1	1	2	4	4	3	4	1	1	3	1	1	4	3	3	2	4	4	2	2	4	3
5	5	4	3	5	5	5	5	5	4	4	4	4	3	3	2	2	3	3	3	2	4	4	4	2	2	3	1	1	1	3	1	2	3	4	1	1	1	2	2	3	3	2	2	2	3	1	3	4	4
4	4	5	3	3	4	4	3	5	4	3	3	5	5	3	2	2	3	2	4	4	2	2	4	2	2	3	3	3	2	3	2	2	4	5	3	3	3	2	4	3	2	3	3	4	2	3	1	3	3
4	3	4	2	3	5	5	4	4	5	4	4	4	4	3	2	2	4	3	3	4	3	3	3	2	4	3	2	3	1	4	3	2	4	4	1	2	1	2	2	2	2	2	3	3	2	1	2	4	4
5	5	5	5	5	4	5	5	5	4	4	4	5	5	4	1	1	3	1	4	4	1	4	4	1	1	1	1	1	1	1	1	1	3	2	1	1	1	4	2	2	1	5	5	3	4	2	2	2	3
4	4	4	3	4	4	5	4	5	5	5	4	4	3	3	3	3	3	2	4	5	3	2	5	3	4	4	3	3	2	2	3	3	3	5	2	2	3	2	1	2	2	2	4	3	2	1	2	2	3
4	4	4	2	5	4	5	3	5	4	3	4	4	4	3	3	4	4	3	3	3	4	4	5	2	4	1	5	2	1	2	5	2	4	5	1	1	3	2	2	2	2	2	1	2	2	1	1	3	3
4	5	5	5	5	5	5	5	5	5	5	5	5	5	4	2	2	4	3	4	4	1	1	5	1	1	1	1	1	1	2	3	2	3	3	1	1	3	1	1	4	4	4	4	4	4	1	2	2	3
4	4	4	3	3	4	4	4	4	4	4	4	4	4	3	2	2	4	3	2	3	3	3	4	1	2	1	3	3	1	1	4	1	3	3	2	2	4	1	1	3	2	2	2	3	2	3	3	4	3
5	5	5	4	5	4	5	5	5	4	4	4	4	4	4	2	2	3	3	2	2	4	4	3	1	2	2	2	4	1	4	2	3	4	1	1	3	3	2	2	2	2	2	3	2	2	1	2	3	3
4	5	5	4	3	5	4	5	5	5	5	5	5	4	4	2	3	3	5	3	4	3	3	3	2	2	4	2	3	1	3	2	2	3	4	1	2	2	1	1	3	4	2	4	4	2	2	3	3	3
5	3	9	3	4	4	5	5	5	4	4	4	4	3	3	2	3	5	3	3	3	3	3	4	1	2	2	1	2	1	1	1	4	4	3	2	4	4	2	2	9	2	2	3	3	3	2	3	5	5
4	3	3	2	4	4	5	4	5	4	4	4	5	5	4	2	3	3	2	2	4	4	4	4	1	4	1	1	2	1	1	2	4	4	1	1	4	2	4	2	2	2	2	4	3	4	4	2	4	4
4	4	5	3	4	5	5	5	5	4	4	4	5	5	3	1	2	3	3	2	2	3	3	4	3	3	4	3	4	2	3	3	2	4	3	1	1	2	2	2	2	2	3	4	3	3	3	1	2	2
5	5	4	3	4	4	4	4	5	5	4	3	4	5	3	2	3	4	4	3	4	3	3	4	2	2	3	4	2	1	2	4	1	4	5	1	1	2	3	3	3	2	2	2	4	3	1	3	4	4
5	5	5	4	4	4	4	4	4	4	5	3	3	3	3	2	4	5	4	3	3	4	4	5	3	3	2	2	3	3	3	3	1	5	5	1	1	2	2	2	2	2	2	2	2	2	2	3	5	3
4	4	4	4	4	4	4	4	4	4	4	4	4	4	3	2	2	3	3	3	3	4	3	4	1	2	1	4	3	2	1	2	1	1	4	1	1	4	2	2	3	2	3	4	8	3	3	3	4	3
4	4	3	2	3	5	5	4	5	5	4	3	4	4	3	1	1	3	3	4	4	3	3	4	1	4	1	1	2	2	3	4	4	5	5	1	1	4	2	2	2	2	2	2	2	1	1	2	5	3
4	4	3	3	4	4	4	4	4	4	3	3	4	4	4	2	3	5	5	4	4	3	3	3	2	2	3	2	2	2	3	2	2	3	2	2	3	3	4	3	4	3	3	4	4	4	4	4	4	3
4	4	4	4	4	4	4	4	5	4	4	4	4	4	1	1	1	2	2	2	2	3	3	3	2	2	3	3	3	2	2	3	3	3	3	3	3	3	2	2	2	2	2	4	2	1	1	2	3	2
5	5	4	5	3	4	5	4	4	4	4	3	3	4	4	2	3	3	4	5	4	3	4	3	2	2	2	2	2	2	2	3	1	3	3	1	2	2	2	2	2	2	2	4	3	2	3	2	4	3
5	4	4	3	5	5	5	5	5	5	5	5	5	5	4	2	2	3	4	4	5	3	3	3	1	2	1	3	1	2	2	3	2	3	5	3	2	3	2	2	2	2	3	4	2	1	2	2	2	2
5	3	3	2	3	5	3	3	4	4	4	3	3	3	2	1	2	2	5	4	3	5	3	5	4	2	1	1	2	1	3	4	1	2	5	5	3	2	2	2	2	2	2	5	3	2	3	2	4	3
4	4	4	3	5	5	5	5	5	4	5	5	5	5	3	2	2	5	4	3	2	4	4	5	1	4	1	1	2	1	1	1	1	5	3	1	1	1	1	1	3	3	4	4	3	3	1	2	3	3
4	5	4	2	3	5	5	5	4	5	4	4	4	4	3	4	3	5	3	3	3	3	3	4	2	3	2	4	3	1	3	4	2	5	5	1	1	1	2	2	4	4	2	2	2	2	2	2	3	3
4	4	4	3	5	5	5	5	4	4	5	4	5	5	3	2	2	4	4	4	3	2	2	4	2	3	3	1	1	1	1	3	2	2	4	2	2	2	2	2	3	3	3	5	3	3	3	2	3	3
5	3	4	3	4	5	5	5	3	5	5	5	4	4	3	9	1	3	3	3	1	1	1	1	1	9	1	1	3	1	1	1	1	5	4	1	1	3	2	5	3	9	2	4	2	2	2	5	5	5
5	5	4	3	4	4	5	3	4	3	4	4	4	3	4	3	3	5	5	4	5	3	3	4	3	2	2	4	2	2	5	3	2	4	3	3	2	4	4	4	5	4	3	4	2	2	1	3	5	2
5	5	5	3	4	3	4	4	4	5	2	3	4	4	2	2	1	3	3	3	4	1	1	5	1	4	3	3	4	1	2	4	3	4	5	1	1	3	1	2	3	3	2	3	4	1	2	1	4	4
5	5	5	2	5	5	5	5	4	4	5	5	4	4	3	3	3	4	3	4	4	3	3	4	2	3	2	2	3	2	3	3	3	4	5	1	1	2	2	2	2	2	2	2	2	3	3	2	4	2
3	3	3	3	3	5	5	4	5	4	3	4	4	5	3	2	3	3	4	3	4	5	5	5	1	3	1	2	1	4	1	3	3	3	2	1	2	3	2	2	4	3	2	3	2	3	3	2	3	3
3	3	2	3	3	2	5	4	3	3	3	4	3	3	3	3	3	4	4	4	4	4	4	4	4	3	4	2	1	2	2	2	4	4	3	1	2	2	4	3	4	4	3	4	4	4	3	2	3	4
5	4	4	4	4	5	5	5	5	5	4	5	4	4	3	2	2	4	3	3	3	2	2	4	1	5	2	1	1	2	3	2	3	3	4	1	1	3	3	3	4	4	4	2	4	3	2	2	2	4
4	4	4	2	4	5	5	5	4	5	4	4	4	3	3	2	2	3	3	2	2	3	3	4	3	3	3	3	4	1	2	2	1	3	2	1	1	1	2	2	2	2	2	3	2	2	2	2	2	4
5	4	4	4	3	4	4	4	5	5	4	4	4	4	2	1	1	2	2	2	4	3	3	9	1	5	1	1	3	1	2	5	4	4	4	1	1	4	2	2	3	1	3	4	3	9	9	1	5	3
3	4	3	3	4	4	4	4	4	3	4	5	4	4	3	2	2	3	5	3	2	4	4	4	2	2	2	2	2	2	2	4	4	4	3	2	3	3	4	2	2	2	3	4	2	2	2	3	3	3
5	5	5	4	4	4	5	5	5	5	5	5	5	5	4	2	2	4	4	4	4	2	2	5	2	4	1	3	3	1	2	3	1	4	5	1	1	3	2	2	2	3	3	4	2	2	2	2	3	3
5	4	4	4	4	4	4	3	4	4	4	4	4	5	3	2	3	3	3	3	2	3	5	3	3	3	1	2	1	1	2	3	3	3	4	2	2	1	2	3	3	2	2	2	3	2	2	2	4	4
3	3	3	3	4	5	5	5	4	5	4	3	3	2	3	2	2	4	4	3	2	4	5	4	3	3	2	5	2	1	1	4	2	2	3	1	1	2	1	1	4	4	4	2	4	3	1	3	3	2
4	3	4	4	4	5	5	5	5	4	4	4	4	4	3	2	2	3	2	3	3	3	3	4	2	4	2	1	2	1	1	3	1	3	5	1	1	3	2	2	4	3	3	2	4	2	2	3	5	3
5	5	5	3	5	5	5	4	5	5	9	4	5	5	2	1	2	3	4	3	3	5	5	9	3	3	3	1	1	1	1	1	3	9	4	1	1	3	2	2	2	3	2	2	2	2	2	2	3	4
5	5	5	4	5	5	4	5	5	4	4	5	5	5	3	1	1	3	2	2	1	2	2	2	2	2	2	2	2	2	3	2	2	3	3	1	2	3	2	2	3	2	3	2	3	1	1	2	4	2
3	3	3	3	4	4	5	5	4	4	4	3	3	3	3	2	3	3	3	2	4	4	4	3	2	2	3	1	2	1	3	4	4	4	4	2	2	3	2	2	3	9	3	5	3	4	3	1	3	4
5	5	4	4	5	4	4	5	5	4	3	4	4	5	3	2	2	3	4	2	5	4	4	4	3	1	1	2	2	1	1	2	3	3	2	2	2	2	2	2	3	4	2	2	3	2	2	3	4	9
5	5	3	3	4	4	4	4	4	4	4	4	4	4	4	3	3	4	3	3	4	4	4	4	3	3	4	2	2	1	3	4	4	4	4	1	1	4	2	2	3	2	2	2	3	2	2	4	4	3
5	5	9	3	5	5	5	4	5	5	4	4	5	5	3	2	3	2	3	3	2	3	4	4	1	4	1	2	5	3	2	2	3	3	4	1	1	1	2	2	4	2	3	2	3	3	4	2	2	3
3	3	4	3	4	5	5	5	5	4	4	4	5	4	3	1	1	4	3	3	3	3	3	3	3	3	3	4	3	1	3	3	2	4	4	1	2	1	2	2	4	2	4	9	3	2	2	3	3	2
4	5	5	3	4	3	4	4	4	5	4	4	4	4	2	3	2	3	3	2	2	4	3	4	3	2	4	4	5	3	4	3	3	4	4	1	3	3	2	2	3	3	2	2	2	2	2	1	2	1
5	5	5	5	5	5	5	5	5	5	3	5	5	5	4	2	2	3	3	4	3	5	5	4	1	3	1	3	1	1	4	1	1	4	1	1	1	4	2	2	3	3	2	3	3	2	2	2	3	4
4	5	5	5	5	5	5	5	5	5	4	5	4	5	4	2	1	3	2	3	4	3	3	4	1	1	1	1	1	1	1	1	1	4	5	1	1	2	2	2	2	2	3	4	3	3	1	3	3	3
4	3	4	4	3	4	4	4	4	2	3	3	4	4	4	5	4	2	2	3	2	4	4	4	9	4	3	3	4	4	4	4	9	2	3	2	2	4	2	4	9	4	4	2	2	2	2	4	4	3
5	4	5	4	4	5	5	5	5	4	4	4	4	4	3	3	2	4	4	3	4	3	3	3	2	3	4	2	3	1	2	3	3	4	9	4	4	4	2	2	3	2	2	3	2	2	3	3	4	4
5	5	5	4	5	5	5	5	5	5	4	4	4	4	4	2	2	4	4	4	3	4	4	5	1	3	1	1	1	1	1	3	4	4	4	2	3	4	2	2	2	2	2	2	3	2	2	3	3	2
5	5	5	5	5	5	5	5	5	4	3	5	4	4	3	1	1	4	3	2	4	3	3	4	2	2	2	2	2	1	2	2	1	3	4	1	2	2	2	3	3	3	3	2	3	2	1	2	3	4
5	5	3	3	4	4	5	5	5	5	3	4	4	4	4	2	3	3	3	3	3	3	3	4	1	2	2	1	1	1	1	2	3	3	3	1	3	3	1	1	3	3	3	4	3	1	2	4	4	5
5	4	5	3	3	4	5	4	5	5	5	4	5	4	2	2	2	3	3	2	4	1	1	3	1	2	1	1	1	1	1	1	1	4	5	1	2	1	2	4	4	4	4	8	4	5	2	2	3	3
3	3	3	3	5	5	5	4	5	5	5	5	5	5	4	1	2	3	4	3	3	3	4	4	1	2	2	2	3	1	4	2	4	4	3	1	3	3	9	2	3	8	8	4	4	2	2	2	3	3
5	4	3	2	3	4	5	4	5	4	4	4	4	4	3	3	2	4	3	4	4	4	3	4	3	2	1	1	1	1	2	4	4	4	5	2	2	3	2	2	2	2	3	4	2	2	1	2	4	5
5	4	5	4	4	4	4	4	5	4	3	5	5	5	3	2	3	3	3	3	2	3	3	3	2	2	1	1	2	1	1	3	2	2	3	1	1	3	2	4	4	4	4	5	4	4	4	2	3	3
5	5	5	4	5	5	5	5	5	5	4	4	4	4	9	2	2	2	3	2	2	3	3	4	1	2	1	1	1	1	3	1	2	3	4	1	4	2	2	2	3	3	3	2	3	2	2	3	4	3
5	5	4	2	4	3	5	5	4	4	4	4	4	5	3	1	2	3	3	2	2	2	2	5	1	5	2	2	4	1	3	4	1	5	5	1	1	1	2	2	2	2	3	2	2	2	1	2	3	2
4	4	3	3	3	4	4	4	4	4	4	4	3	3	3	2	3	3	2	3	3	3	3	3	2	2	2	2	4	2	2	3	4	4	3	2	2	2	2	2	3	2	3	3	4	3	3	3	5	4
4	4	4	3	4	5	5	3	4	4	9	5	5	4	3	2	2	2	3	4	2	2	3	4	1	3	1	3	2	1	9	3	3	3	4	1	2	3	3	3	4	2	2	3	3	3	2	3	5	4
4	4	4	2	5	4	5	5	5	4	3	4	4	4	2	3	1	3	3	2	2	1	1	4	2	2	2	2	4	1	2	4	3	3	3	1	3	3	4	2	3	9	3	5	4	4	3	2	2	3
4	4	4	3	5	4	4	4	4	4	3	4	5	5	1	2	1	5	5	4	4	4	3	2	1	3	3	5	2	1	3	2	3	3	3	1	1	4	2	3	3	2	3	4	4	3	3	2	2	2
5	5	4	4	4	4	4	4	5	5	5	4	4	4	3	2	3	4	4	4	3	3	3	4	1	2	2	2	3	1	3	2	4	4	4	2	3	3	2	2	2	2	3	3	2	2	2	3	4	3
5	5	5	4	5	5	5	5	4	4	5	5	3	4	3	3	4	4	4	5	5	3	3	4	2	4	2	1	1	1	2	3	4	4	5	1	3	2	2	2	3	3	4	2	4	4	1	2	4	2
4	4	4	4	4	4	5	5	5	5	5	5	5	5	4	4	4	4	4	3	3	2	3	4	1	4	1	1	1	1	3	3	1	3	3	2	4	3	2	3	4	3	2	4	4	3	3	2	4	4
5	5	5	5	4	4	5	5	5	4	5	3	5	4	3	1	3	3	3	2	4	3	4	4	1	2	2	2	1	1	3	4	3	4	5	1	1	2	2	2	2	2	2	5	4	3	1	1	3	3
5	5	5	4	3	3	4	4	5	5	5	5	4	5	3	1	3	4	3	5	5	3	3	5	4	4	2	3	3	2	2	5	1	4	5	1	1	2	2	2	2	2	2	4	3	3	1	2	5	2
4	4	3	4	4	5	5	5	5	5	4	4	4	4	3	1	3	4	3	4	4	2	2	4	3	4	1	2	4	2	2	3	3	3	4	1	2	3	2	2	3	2	3	5	3	2	2	1	4	4
5	5	5	4	3	4	4	4	4	5	4	4	5	5	2	1	1	1	2	3	2	2	2	5	2	2	4	2	2	1	4	3	3	4	4	1	1	3	2	2	2	2	2	2	2	2	1	2	5	2
5	5	5	5	4	4	4	4	4	5	4	5	4	5	3	2	2	3	3	2	4	3	3	5	1	3	3	1	2	1	3	3	1	2	4	2	2	2	2	2	3	3	3	2	3	2	2	3	3	3
3	3	4	1	4	8	5	4	4	4	5	4	4	4	2	2	2	3	3	4	4	4	4	4	2	3	2	1	1	2	4	2	4	9	3	1	3	4	2	2	4	4	3	4	3	4	2	2	4	4
4	5	4	2	5	5	5	5	4	4	5	4	5	5	3	2	3	4	4	8	3	5	5	4	1	3	2	1	1	1	2	1	3	4	3	1	3	3	4	3	4	4	3	2	3	2	2	3	4	3
4	5	5	4	4	3	5	4	4	5	3	4	4	3	3	2	2	4	3	2	4	4	2	4	1	1	1	2	4	2	1	2	5	5	1	1	1	4	2	2	2	2	2	2	2	2	2	4	5	4
4	5	4	4	5	4	5	5	3	4	4	3	4	4	3	1	1	4	3	4	3	4	3	2	2	2	2	2	2	2	2	3	3	3	2	2	2	2	4	2	3	2	3	3	4	2	4	3	3	4
4	4	4	4	5	4	5	5	5	4	3	4	4	5	4	3	2	3	4	4	3	3	3	5	2	2	2	1	3	1	3	4	3	4	5	1	1	2	2	2	2	3	4	4	2	2	3	3	4	4
4	5	5	3	4	4	5	5	4	4	3	4	4	4	4	1	2	3	3	2	3	4	4	4	3	2	2	2	2	1	2	3	1	2	4	1	1	2	2	2	2	3	4	4	2	2	3	3	5	4
5	5	5	5	5	4	5	5	5	4	3	4	5	4	3	2	3	2	3	4	4	1	2	5	1	1	1	2	3	1	1	3	2	3	5	1	1	4	2	2	2	2	2	2	2	2	2	3	5	5
4	4	5	4	4	5	5	5	4	4	4	4	5	4	4	3	3	3	3	5	5	3	3	4	3	3	4	4	4	2	4	3	2	4	5	1	1	2	2	2	2	2	3	4	3	2	1	2	4	3
4	4	3	3	4	5	5	5	4	4	4	4	4	5	3	2	3	4	3	3	3	4	4	4	3	2	3	1	2	2	3	3	3	2	5	3	3	5	2	3	2	2	2	3	3	1	1	3	4	2
5	5	5	3	5	5	5	5	5	4	3	4	5	5	3	1	1	3	2	4	2	2	2	4	2	4	3	2	4	1	1	3	4	4	5	1	3	3	2	2	2	2	2	2	3	2	2	3	4	1
5	4	3	2	4	5	5	5	5	5	4	5	5	5	3	1	1	4	4	2	2	2	2	5	2	4	4	4	2	1	1	5	3	3	5	1	1	1	9	2	3	3	2	4	2	3	2	2	2	3
5	5	5	3	4	3	4	4	5	4	4	4	5	5	3	2	2	3	4	3	3	3	3	3	4	2	1	1	2	1	3	4	3	4	4	1	1	4	2	2	2	2	2	2	2	2	1	2	5	4
5	5	4	3	5	4	4	4	5	9	4	4	4	4	3	2	2	4	3	3	4	1	1	4	2	3	3	4	1	1	2	3	3	5	3	1	3	3	2	3	3	3	4	4	3	2	2	3	4	4
5	5	4	2	4	4	5	5	5	5	4	4	4	4	9	1	9	3	3	3	9	4	5	5	1	4	2	1	2	1	3	3	3	4	4	2	2	4	3	2	3	3	2	3	3	2	1	2	4	3
3	4	3	2	4	5	5	5	4	4	3	4	4	4	3	2	3	3	3	2	2	3	3	4	4	4	1	3	3	2	2	3	2	4	5	2	2	2	1	2	3	2	2	2	3	3	2	2	3	4
5	5	3	5	5	4	4	3	4	5	3	3	3	4	3	3	3	3	3	4	4	3	3	4	1	5	1	3	4	1	2	5	3	3	5	2	2	3	2	2	2	2	2	3	2	2	1	3	4	4
5	5	4	4	4	4	5	5	5	5	5	5	5	4	3	1	1	2	2	2	2	2	2	4	3	4	2	3	4	1	2	4	3	3	4	1	1	2	2	2	3	2	2	4	2	4	1	2	3	2
4	4	5	3	3	4	5	5	5	4	4	4	4	3	3	2	3	4	3	3	4	3	3	5	2	2	2	3	4	1	1	5	1	4	4	1	1	1	2	2	4	2	3	4	4	3	2	3	3	4
4	4	4	3	4	4	5	4	4	4	4	4	4	3	3	2	3	4	3	4	3	3	3	3	3	4	3	4	4	2	2	4	4	4	4	3	3	3	3	3	3	2	2	4	4	2	2	2	2	2
5	4	3	3	3	4	5	5	5	5	4	4	4	4	3	2	2	2	3	2	2	3	3	4	2	2	2	2	3	2	3	2	4	5	4	1	8	3	2	2	2	2	3	4	2	3	2	2	3	3
4	5	5	5	5	5	5	5	5	4	5	5	5	5	8	2	2	4	3	2	2	4	4	3	1	3	2	4	3	3	9	2	3	4	4	1	3	4	2	3	2	2	3	3	3	2	2	1	1	4
4	3	4	2	4	5	5	4	4	5	4	3	4	5	3	2	1	4	3	2	2	3	3	4	1	2	3	1	2	1	1	3	3	4	5	1	1	2	2	2	3	3	4	4	4	4	3	1	3	5
5	5	5	4	5	4	5	5	5	5	5	5	5	5	3	2	2	4	3	4	3	1	1	4	3	2	2	1	3	1	2	3	3	4	4	1	1	1	2	2	3	2	2	3	3	2	1	2	3	4
5	5	5	3	4	5	5	5	5	5	5	5	5	5	3	2	2	3	3	3	2	1	1	3	3	2	1	1	3	2	1	2	3	4	4	1	2	3	2	2	3	2	2	3	3	2	1	1	4	3
4	4	4	4	3	3	4	4	4	4	4	4	4	4	3	2	3	4	3	2	2	2	2	5	2	2	3	4	3	2	3	5	3	3	5	1	1	3	2	2	2	2	2	2	2	2	2	4	5	3
4	5	4	4	4	5	5	5	4	4	4	3	4	4	3	2	3	3	3	4	3	3	3	4	2	2	2	4	4	1	2	5	2	2	4	1	1	2	2	3	3	2	3	3	3	2	2	4	5	3
4	4	5	4	4	3	5	5	4	5	4	4	5	5	3	2	2	3	4	4	4	3	4	4	2	3	1	2	2	1	2	4	2	4	4	1	1	3	2	2	4	2	4	2	2	4	3	2	4	4
5	4	5	4	5	5	5	5	5	4	3	4	4	4	3	2	2	3	3	2	4	2	2	5	3	4	1	3	3	1	1	4	3	3	5	1	1	3	2	2	2	2	2	3	2	2	2	3	3	4
4	4	5	4	5	4	5	5	4	4	4	4	5	5	3	2	2	3	3	2	4	2	2	5	3	3	3	1	1	2	3	5	4	4	5	1	1	1	2	2	2	2	2	2	2	2	1	2	3	5
4	4	3	3	4	4	4	4	4	3	4	4	4	4	4	2	2	3	2	3	2	5	5	4	1	4	1	1	3	1	1	3	2	3	4	1	1	3	2	4	4	4	2	4	3	2	1	3	4	4
4	4	4	4	3	4	5	5	4	5	4	5	5	3	3	2	9	5	3	3	3	4	4	4	1	3	1	3	4	2	2	1	3	5	1	1	1	3	4	2	3	3	3	4	3	3	1	3	4	5
4	4	5	9	5	4	5	5	4	4	3	4	4	5	2	3	4	3	5	4	4	4	4	4	3	2	3	2	2	1	2	4	2	4	4	1	1	3	2	2	3	2	3	4	4	3	4	3	3	4
5	5	5	3	4	4	4	4	4	4	3	4	3	4	4	2	2	4	3	3	3	4	4	3	1	2	2	3	8	2	2	4	4	3	4	2	3	4	2	2	3	2	3	5	4	2	2	2	4	3
5	5	4	2	4	4	5	5	4	5	3	4	4	3	3	2	3	3	4	3	3	3	1	4	3	4	1	4	5	1	1	5	2	3	5	2	2	3	2	2	2	2	2	5	2	2	2	3	3	2
4	4	5	4	5	5	5	5	4	4	4	5	4	4	4	2	2	2	3	2	3	2	2	4	3	4	3	4	2	2	2	4	3	3	4	2	3	3	1	1	3	3	4	4	3	2	2	2	2	3
5	5	5	4	5	5	5	5	5	5	5	4	5	5	3	1	1	4	3	3	2	3	2	9	1	2	1	1	2	1	2	2	3	3	4	1	2	2	2	2	3	3	3	4	4	3	3	2	4	2
4	3	3	3	5	5	4	5	4	4	3	4	4	3	4	2	3	4	4	5	4	3	3	4	2	3	3	4	1	1	1	5	4	4	5	1	5	4	2	2	2	3	4	4	2	4	1	3	4	3
5	5	5	5	5	5	5	5	4	4	5	5	4	4	3	2	3	4	4	4	3	3	3	3	2	4	1	1	2	2	2	2	3	4	4	1	2	3	1	2	2	3	3	2	3	3	3	3	4	3
5	4	4	3	5	5	5	4	4	4	3	4	4	4	3	3	2	3	4	4	2	3	3	4	1	3	3	2	2	1	3	4	3	4	3	1	1	2	2	2	2	2	2	5	3	2	2	4	4	4
5	5	5	3	3	4	4	4	5	5	5	4	4	4	3	1	1	3	3	4	4	2	2	3	2	3	2	2	2	2	2	3	2	4	4	2	2	2	2	3	3	3	3	3	3	1	2	2	3	4
3	3	3	1	3	3	4	4	3	4	3	3	3	2	2	3	2	3	5	3	4	3	4	5	1	1	1	3	2	2	2	1	3	4	5	2	3	3	2	3	4	5	4	4	4	2	4	3	5	4
5	5	5	5	5	5	5	5	5	5	3	5	4	4	3	2	2	2	2	3	4	2	2	5	2	4	3	3	4	5	4	4	1	4	4	1	1	1	2	2	2	1	2	2	3	2	1	1	3	2
5	4	3	3	4	3	4	5	5	4	4	5	4	4	4	5	5	4	4	5	5	4	4	4	4	3	4	4	3	3	3	3	3	4	3	3	4	4	2	2	3	2	2	3	3	2	2	4	3	3
4	4	4	4	5	5	5	5	5	4	4	4	5	4	3	2	2	3	4	4	4	3	3	5	2	3	2	1	4	1	1	2	3	3	5	1	1	3	2	3	4	3	3	2	2	1	1	4	5	4
5	4	4	2	4	3	3	4	5	4	4	3	4	4	4	3	3	5	4	3	3	3	3	5	3	3	3	4	5	4	3	4	3	5	5	1	1	2	2	3	3	4	2	3	4	1	1	3	4	2
4	4	4	4	4	4	4	4	5	4	4	4	4	4	3	3	2	3	4	2	4	3	3	4	3	3	3	3	3	3	4	3	3	3	4	2	2	2	2	2	2	2	4	4	4	2	2	1	5	3
5	5	5	3	4	4	5	4	5	5	5	4	5	5	3	1	1	5	5	3	2	1	1	3	1	2	1	2	1	1	1	2	1	2	5	1	1	1	1	1	5	5	5	5	4	4	1	4	5	4
5	5	4	3	3	4	5	5	4	4	4	4	4	4	3	1	1	3	2	3	3	3	3	2	2	2	2	3	2	1	1	4	2	2	3	1	1	4	5	5	5	5	2	5	5	2	3	2	2	2
5	5	4	4	5	5	5	5	5	5	4	5	9	5	4	5	2	3	3	3	2	3	3	4	3	3	1	1	1	1	1	2	2	4	4	2	4	4	2	2	3	3	2	4	4	4	1	3	3	4
5	5	4	3	5	5	5	4	5	5	5	5	5	5	2	1	1	3	3	2	3	4	4	4	1	2	2	2	1	1	1	4	3	4	2	1	4	3	2	2	3	2	3	3	2	2	2	2	4	3
5	4	4	3	4	5	5	5	4	5	4	4	4	4	4	2	3	3	3	2	2	5	5	5	1	4	1	3	1	1	1	5	4	5	5	1	4	4	1	2	3	3	2	5	2	3	3	1	2	3
5	5	4	1	3	5	5	4	5	4	4	4	4	4	4	3	3	4	3	3	3	3	3	4	3	3	3	1	4	1	4	4	3	4	4	1	3	3	1	1	3	3	2	2	4	2	2	3	4	4
5	5	5	4	5	5	5	5	4	5	4	4	4	4	3	1	1	3	4	2	2	2	2	5	4	3	3	2	3	1	2	1	1	2	5	2	2	2	2	2	3	3	2	2	4	3	1	4	4	3
5	5	9	4	4	4	5	4	5	5	4	4	4	3	3	2	3	3	3	3	3	2	2	3	3	3	3	2	2	2	4	3	3	4	4	2	2	4	2	2	3	3	2	2	4	4	2	3	3	3
4	4	5	3	4	2	5	3	4	5	4	4	3	4	3	2	3	5	3	2	2	3	3	4	1	1	2	2	4	1	2	5	4	5	5	1	2	4	2	2	2	2	2	2	2	2	2	4	5	5
4	5	5	5	5	5	5	5	5	4	5	5	5	5	3	2	2	3	3	3	3	3	4	3	1	2	1	1	1	1	3	1	3	4	4	1	4	4	2	3	2	3	3	2	4	2	2	1	3	4
5	5	5	4	5	5	5	5	4	5	4	5	5	5	5	1	1	3	3	2	4	3	3	4	1	2	2	1	2	1	3	1	1	3	3	1	3	3	2	5	3	4	4	5	3	4	4	2	2	2
4	4	4	3	5	4	5	4	4	4	4	5	5	5	3	1	1	3	3	2	3	2	2	4	1	4	3	4	2	2	2	3	1	5	5	1	3	2	2	2	4	2	4	4	4	2	2	2	1	2
5	5	4	3	4	4	5	4	5	4	4	4	4	3	3	3	4	3	3	3	4	3	3	4	3	4	1	4	2	1	3	5	4	4	1	1	1	1	2	4	3	4	4	4	4	3	4	3	3	3
5	5	5	4	5	4	4	4	5	4	4	4	5	5	4	1	3	8	3	2	2	1	1	5	2	1	1	1	1	1	1	4	4	4	4	1	1	4	2	2	3	3	2	3	2	3	2	3	5	4
4	4	4	3	4	3	3	4	4	4	5	5	5	5	4	2	3	3	4	3	4	3	3	5	3	5	2	2	3	1	2	5	3	3	5	2	2	4	2	3	2	2	2	5	2	2	2	2	4	4
4	4	4	4	5	4	4	4	5	5	5	5	5	4	3	2	1	4	3	4	4	4	4	3	1	3	1	1	3	1	3	4	3	4	4	1	1	2	2	2	3	3	3	2	3	2	2	3	3	4
3	3	3	1	3	4	4	4	5	4	5	5	4	4	3	1	1	3	3	2	2	3	3	5	3	4	3	4	1	1	3	4	4	4	5	1	1	3	2	2	2	2	2	2	3	2	2	1	4	3
3	3	3	3	3	4	4	4	3	4	3	3	3	4	4	3	3	4	4	3	4	4	4	4	3	3	3	3	3	3	4	4	3	4	5	3	3	4	2	3	2	4	2	4	3	3	2	2	3	3
5	4	4	4	3	4	9	4	4	4	3	4	4	4	3	3	2	3	2	3	3	3	5	5	2	4	3	2	3	2	2	3	3	3	5	2	2	3	2	2	4	2	4	4	4	3	3	4	4	4
4	3	4	3	3	4	5	4	4	4	3	3	4	4	3	2	2	3	3	4	5	3	3	4	3	4	3	3	4	3	4	4	3	3	4	3	3	3	2	2	2	2	2	4	2	2	1	2	5	3
4	4	4	4	5	5	5	5	5	5	5	5	5	5	2	1	2	2	3	3	3	2	2	3	2	2	3	2	3	1	3	3	3	3	3	2	2	3	2	2	3	4	3	3	3	3	1	2	2	3
5	4	4	3	4	4	4	4	5	4	4	4	3	4	3	3	3	4	4	3	2	3	3	5	3	5	4	4	3	1	1	4	3	3	4	3	2	3	2	2	3	3	3	2	4	2	2	2	4	4
4	4	5	4	5	4	5	4	4	4	5	4	4	3	4	2	2	4	3	5	4	4	4	3	1	2	2	2	2	1	4	2	3	4	5	1	3	3	3	2	4	4	4	5	5	4	2	2	4	3
5	1	1	1	5	4	4	4	3	5	4	4	4	4	3	2	3	4	4	4	5	5	4	4	2	4	2	4	2	2	2	2	4	4	2	2	4	5	2	4	5	5	4	2	4	2	1	3	3	3
4	4	4	3	3	3	4	4	4	4	4	3	4	4	3	1	1	2	2	2	1	4	4	4	1	2	1	4	4	1	2	5	3	4	5	1	2	3	2	2	2	2	2	3	2	2	2	4	4	4
5	5	4	4	5	5	5	5	5	5	5	5	5	5	3	2	2	3	3	3	3	3	3	5	1	3	2	2	1	1	3	3	3	3	4	1	2	3	1	3	3	3	3	3	3	4	4	1	3	3
5	5	4	4	4	5	5	4	5	5	5	5	5	5	3	3	2	3	3	4	2	4	4	5	2	3	2	3	1	1	2	4	2	3	5	1	1	1	1	1	3	2	2	4	2	2	1	2	3	4
4	3	3	4	4	4	5	5	5	4	4	5	5	4	3	3	3	4	4	4	4	4	3	4	3	4	4	4	3	2	2	4	3	4	4	1	4	4	4	3	8	2	3	3	4	2	2	1	3	4
5	5	4	3	5	5	5	5	5	5	5	5	5	5	3	1	1	2	3	2	4	2	2	5	2	4	3	2	2	1	2	5	4	4	5	1	1	2	2	2	2	2	2	2	2	2	1	1	5	4
5	5	4	4	5	5	4	4	4	4	3	4	4	4	4	8	3	3	3	3	4	4	4	4	3	4	3	3	3	2	2	3	4	4	5	2	2	3	2	2	3	2	3	2	2	2	2	3	4	3
5	5	5	3	4	5	5	5	5	4	4	3	4	4	3	2	2	3	3	4	3	3	3	5	3	3	3	4	4	1	4	4	3	4	4	1	2	3	2	2	3	2	3	2	3	4	2	3	3	3
5	5	5	4	4	5	5	5	5	5	5	4	5	5	3	1	1	4	4	3	4	5	5	5	3	5	5	5	5	3	5	5	5	5	5	3	5	5	2	2	3	2	2	4	2	2	2	9	9	9
5	5	5	3	5	5	5	5	5	5	5	5	5	5	3	1	1	3	2	4	3	3	4	4	1	2	2	4	2	2	3	3	3	4	3	2	4	3	2	2	2	2	3	5	3	2	2	1	2	2
4	4	4	4	4	4	4	4	4	4	5	4	4	5	2	2	2	3	4	3	3	4	4	3	3	3	3	3	3	3	3	3	3	3	4	3	3	4	2	2	2	2	4	5	3	3	3	2	4	3
5	5	4	4	3	3	4	3	3	3	4	3	3	3	3	4	3	3	3	3	3	4	4	5	4	4	4	4	4	4	4	4	4	4	4	3	3	3	2	3	2	2	2	2	2	2	2	3	3	4
5	4	4	4	4	4	5	3	5	5	4	4	5	5	3	2	2	2	2	2	3	4	3	3	2	2	4	3	1	1	3	3	2	3	5	1	1	1	4	4	3	3	3	5	2	2	4	3	3	4
5	5	5	4	4	4	5	5	4	4	5	5	4	4	3	2	3	5	4	3	3	3	3	5	3	4	4	2	3	2	3	4	4	4	4	2	3	4	2	3	3	3	2	2	3	1	1	2	3	3
4	4	5	3	5	5	5	5	5	4	4	4	4	4	3	2	2	3	3	3	3	3	3	3	3	4	1	2	2	1	1	2	1	2	3	2	1	2	4	2	3	3	4	4	3	2	2	4	4	3
4	3	3	3	3	4	4	3	4	3	4	4	3	3	3	4	3	4	3	3	2	4	4	4	2	5	2	4	3	2	2	3	3	2	5	1	1	4	3	2	3	4	3	3	4	3	3	3	5	4
3	4	3	4	5	4	3	5	4	4	4	3	4	5	4	4	4	3	4	5	4	4	4	4	4	4	4	3	3	4	4	5	3	4	4	3	3	5	2	2	2	3	3	2	2	1	1	3	3	3
4	4	9	3	5	4	5	4	5	5	4	5	5	4	4	2	3	3	3	4	3	4	5	2	1	2	3	1	1	1	3	1	3	4	4	1	2	4	4	3	4	4	4	3	3	4	3	3	4	3
4	4	4	3	3	4	5	4	5	4	4	3	5	5	4	2	3	3	4	2	4	4	4	5	3	4	3	3	4	3	3	2	3	4	5	2	3	3	2	2	3	3	3	4	3	3	2	2	3	3
4	2	4	3	5	5	4	5	5	3	3	4	4	5	4	3	3	4	3	4	3	4	3	4	1	3	1	2	3	2	1	4	4	4	5	1	4	4	2	2	4	4	4	5	4	2	1	1	5	4
5	5	5	4	3	4	4	5	5	4	4	3	4	4	3	2	3	3	3	4	3	4	3	4	2	3	3	3	2	1	2	4	3	3	4	4	4	4	2	2	4	2	2	2	2	2	2	3	5	3
5	5	4	4	4	5	4	5	4	4	3	4	5	4	4	3	2	3	3	3	4	4	4	3	3	4	4	3	4	3	4	3	3	4	3	3	3	4	2	2	3	2	2	2	2	2	2	3	4	3
4	5	5	5	5	4	4	5	5	5	5	4	5	4	2	2	2	4	4	3	4	4	4	3	3	3	3	1	4	1	3	4	3	4	3	1	4	5	2	2	2	2	2	4	2	1	2	3	3	3
5	4	3	3	3	4	5	4	4	5	4	4	5	4	3	3	3	4	3	3	2	4	4	3	1	2	4	4	4	1	4	4	4	4	3	1	4	4	2	2	2	2	2	2	2	2	2	2	3	4
5	5	3	3	5	5	5	5	5	4	3	4	5	5	3	1	2	4	2	2	1	4	5	5	2	2	1	3	1	1	3	5	4	5	5	1	2	3	1	1	2	2	2	5	2	4	1	1	4	3
5	5	4	3	5	4	5	5	5	5	4	4	4	5	3	2	2	4	3	4	4	3	3	4	2	2	5	1	3	1	4	4	3	4	5	1	2	3	2	1	3	3	2	4	3	2	2	3	4	3
5	5	5	3	5	5	5	5	5	5	5	5	5	5	3	2	2	2	2	3	3	3	4	4	2	3	2	3	2	1	2	3	3	4	4	2	2	2	2	1	3	2	1	5	3	2	1	1	3	3
5	4	4	5	5	5	5	5	5	5	5	5	5	5	3	2	2	3	3	3	3	3	3	4	2	3	2	2	2	1	3	4	4	5	4	1	2	2	2	2	3	3	3	3	3	2	2	1	2	2
4	4	3	3	5	5	5	5	4	5	5	5	4	4	3	2	3	3	3	2	2	2	2	3	2	3	1	2	3	1	3	4	3	3	4	1	2	2	2	4	4	4	4	2	4	2	2	2	4	3
4	3	4	3	3	3	4	3	3	4	4	4	3	3	3	4	2	3	5	3	3	4	4	4	3	3	5	4	3	2	4	3	3	5	5	3	4	4	2	2	4	3	2	3	3	2	2	3	4	4
5	5	5	5	5	5	5	5	5	4	4	5	5	5	3	2	1	4	4	3	3	3	4	4	1	2	1	1	1	1	3	2	3	4	4	1	4	4	2	3	3	2	3	2	3	2	2	3	4	4
4	4	3	3	4	5	5	5	4	4	4	4	4	4	3	2	3	3	3	3	3	4	4	3	3	3	4	3	4	1	4	4	4	4	5	1	1	3	3	3	3	3	3	3	3	2	2	3	2	3
5	5	4	4	5	5	5	5	5	5	5	5	4	4	3	2	3	4	4	2	2	4	4	4	1	2	3	1	2	1	2	2	1	1	2	1	1	1	2	4	4	3	3	3	4	3	2	3	4	3
4	4	3	3	5	5	5	5	5	4	4	5	5	5	3	2	2	3	3	2	2	3	3	4	1	3	1	4	3	3	2	4	3	4	4	2	2	3	2	2	2	2	3	3	3	4	4	2	3	2
4	4	4	4	4	4	4	4	4	4	3	4	5	4	3	2	2	2	1	4	4	3	4	5	3	5	3	2	4	1	2	4	3	4	5	1	1	1	2	2	3	3	2	3	3	2	1	3	5	3
5	5	5	2	4	4	5	5	5	5	4	4	5	4	3	2	3	3	2	3	1	4	4	3	2	2	1	2	1	1	2	2	2	4	3	1	2	3	1	4	4	4	4	3	3	2	2	3	4	4
5	4	4	2	4	4	5	5	5	5	5	5	5	5	3	2	3	4	3	2	2	3	3	4	3	2	3	2	1	2	3	5	3	5	5	1	1	4	2	3	3	3	2	2	4	2	1	2	3	4
5	5	3	3	5	5	5	5	5	4	4	5	4	4	5	1	3	4	3	4	4	4	4	4	3	4	3	4	4	2	4	4	3	4	4	2	2	3	2	2	3	2	2	3	3	2	1	2	2	3
5	5	4	3	3	4	5	5	4	5	4	4	5	5	3	1	1	1	2	3	3	4	4	4	2	2	1	1	2	1	1	2	2	5	4	2	3	4	2	2	2	2	2	4	3	1	1	4	4	4
5	4	5	3	5	5	5	5	5	5	4	4	4	4	2	2	2	3	3	2	2	3	3	4	2	3	2	2	3	1	4	3	4	4	4	2	2	3	2	2	2	2	2	3	2	2	2	3	3	4
4	4	3	5	4	5	5	5	5	5	5	5	5	5	3	1	2	4	4	4	2	1	1	5	2	4	2	2	3	1	2	4	4	4	4	1	1	2	2	3	3	3	4	5	3	3	2	3	4	3
5	4	3	3	5	5	5	5	4	4	3	4	5	3	4	2	2	3	3	2	2	3	3	5	2	4	1	3	3	1	5	5	4	5	5	1	2	5	2	1	2	2	2	2	2	3	2	2	3	4
5	5	5	3	5	5	5	5	5	5	4	4	3	3	3	3	2	4	3	2	3	1	1	3	1	2	2	2	1	1	2	3	3	3	3	2	3	4	4	4	4	4	2	3	5	5	1	3	3	4
5	5	5	3	4	4	4	3	5	4	3	4	4	3	3	1	1	3	3	2	3	4	4	5	1	2	1	4	1	1	3	2	4	5	4	1	5	3	2	2	4	4	2	5	3	2	2	1	4	4
5	5	5	4	4	4	5	5	4	4	3	4	4	4	3	3	3	3	4	4	4	4	4	4	2	3	2	3	3	2	2	3	3	3	3	2	2	3	2	2	2	2	2	5	2	2	2	4	5	4
5	5	4	3	4	4	4	4	5	5	5	4	4	5	4	2	2	3	2	4	4	3	3	3	2	2	1	1	2	1	3	3	4	5	5	1	4	4	2	2	4	3	2	2	3	2	2	2	4	4
4	4	5	3	4	4	5	5	5	4	4	4	4	5	3	4	2	3	3	3	3	4	4	4	2	3	2	3	2	2	3	8	4	5	3	3	5	5	4	2	4	2	2	4	2	2	2	2	5	2
5	5	5	3	8	5	5	5	5	5	4	3	5	5	3	2	2	3	3	9	3	4	4	3	2	3	2	1	3	1	2	3	3	4	4	1	3	3	2	4	4	3	4	2	3	4	9	3	4	4
4	5	4	3	2	5	5	5	5	5	3	4	4	5	3	2	2	4	4	3	4	3	3	4	4	4	4	4	4	1	4	4	3	4	4	2	2	3	1	1	3	2	3	5	3	3	2	2	4	4
5	4	4	2	5	5	5	5	5	5	5	5	5	5	3	2	2	3	4	3	3	3	3	4	3	3	2	2	3	1	2	3	3	4	4	2	2	2	2	2	2	3	3	4	3	2	3	2	3	3
5	4	5	5	5	5	4	4	5	5	5	5	5	5	3	5	1	4	4	5	3	4	4	2	2	2	2	3	2	2	2	2	2	2	2	2	9	4	2	4	3	3	3	2	4	3	3	3	4	4
4	4	4	3	4	5	5	5	5	5	5	5	5	5	3	3	2	3	4	3	3	4	4	4	2	2	2	3	3	2	2	3	3	4	4	1	2	2	2	2	2	2	2	2	3	3	2	3	5	3
5	5	5	5	5	5	5	5	5	5	5	5	5	5	5	2	5	5	3	4	4	3	4	5	2	2	2	2	1	1	4	3	1	4	5	1	1	4	2	2	4	4	3	3	4	2	2	4	4	4
5	5	5	4	5	5	5	5	4	4	4	4	4	4	4	2	3	3	3	2	3	4	5	5	5	2	1	2	2	2	2	3	4	4	4	1	2	2	1	3	3	3	3	5	3	2	2	2	3	4
3	4	4	4	3	5	5	5	5	5	5	4	4	3	3	3	3	4	4	3	4	3	2	4	2	3	2	2	3	2	3	1	2	2	4	1	1	3	4	4	5	5	5	5	5	5	5	3	3	4
5	4	5	1	5	5	5	5	5	5	5	5	5	5	1	1	1	3	3	4	5	2	4	4	3	2	5	1	2	1	4	3	3	4	2	1	2	3	2	4	5	4	4	5	5	2	1	2	2	5
5	5	5	3	5	5	5	5	5	5	5	5	5	5	4	2	3	4	3	4	2	4	4	4	1	3	2	1	1	1	4	3	2	4	3	1	1	2	2	2	4	3	4	3	5	3	3	2	3	3
5	5	3	3	4	4	5	4	5	5	4	4	5	5	2	2	2	2	4	2	2	4	4	4	1	3	3	3	3	3	3	4	4	4	4	2	3	4	4	2	2	2	2	3	3	2	2	2	3	3
4	4	3	3	3	4	5	5	4	4	4	3	4	4	3	2	2	3	4	3	3	3	3	5	4	3	3	3	3	1	3	5	3	4	5	1	3	4	2	2	2	2	2	2	3	2	2	4	5	4
4	5	5	3	4	5	5	5	4	4	5	5	4	3	3	2	2	3	5	2	2	2	2	5	1	5	1	3	5	1	3	5	3	3	5	1	1	4	2	2	4	2	3	2	4	3	2	2	5	5
4	3	3	3	3	4	9	4	4	9	3	4	4	4	4	4	2	4	2	3	3	3	3	4	4	4	4	4	4	3	3	4	4	4	4	9	3	4	9	4	4	4	4	4	4	2	2	4	4	4
5	5	5	4	5	5	5	5	5	5	5	4	4	4	5	2	2	3	3	4	4	3	3	3	2	2	2	2	3	2	2	4	3	4	5	4	3	3	2	2	3	3	2	5	4	4	4	2	2	4
5	5	5	4	5	5	5	5	5	5	5	5	5	5	4	2	2	3	4	3	3	3	3	3	2	3	3	2	2	2	3	4	3	4	4	2	3	3	2	2	2	2	4	4	2	3	2	4	4	3
5	5	4	3	4	5	5	5	5	5	5	5	5	5	3	2	2	4	4	2	4	3	4	4	1	2	3	1	2	1	4	4	3	5	3	1	1	1	2	4	4	2	2	4	3	2	1	4	4	4
4	5	5	3	5	4	4	5	5	5	5	4	4	5	4	2	4	4	5	4	4	3	3	4	9	1	3	1	4	1	1	3	4	4	3	1	3	4	4	4	4	4	4	3	5	3	2	3	4	4
5	5	4	4	5	5	5	5	5	5	4	4	4	5	4	1	1	4	4	4	3	4	3	4	2	3	4	3	2	2	3	3	2	4	5	2	2	3	2	2	2	3	2	4	3	2	2	2	3	4
5	5	4	4	5	5	5	5	5	4	4	5	4	4	4	3	2	3	3	4	4	4	4	4	3	2	2	4	4	1	9	2	3	4	5	1	1	2	2	2	2	2	2	4	3	2	2	4	4	4
4	4	4	4	5	4	5	5	5	5	5	5	5	5	4	3	2	4	5	3	3	4	4	4	2	1	1	2	1	1	2	3	3	4	5	3	5	3	4	2	2	3	2	3	2	2	1	5	5	4
4	3	4	4	4	3	3	4	5	5	5	4	4	4	4	2	2	4	3	4	2	4	3	4	4	3	2	4	4	2	2	4	2	4	4	2	2	3	2	3	4	4	4	3	4	1	1	3	4	4
5	4	5	2	4	4	4	5	5	5	4	4	5	4	4	2	2	4	3	2	3	3	3	5	2	2	3	2	2	1	3	2	3	5	4	1	1	3	2	1	3	4	3	5	3	2	2	3	3	4
5	5	5	2	4	4	5	5	5	5	5	5	4	5	3	2	3	3	2	3	2	4	4	3	1	2	1	2	2	2	2	2	2	3	2	1	2	3	1	4	4	4	4	3	3	1	1	3	4	4
3	3	3	3	5	5	5	5	5	5	5	5	5	3	4	3	3	4	4	3	3	3	3	4	2	3	2	2	2	3	2	2	4	4	2	3	4	4	3	8	4	4	4	4	3	2	2	3	4	4
4	3	3	2	4	5	5	5	5	4	4	4	4	4	3	2	2	3	3	3	3	4	4	4	2	3	3	1	3	1	1	4	4	4	4	1	2	3	2	2	4	4	3	4	4	3	1	3	4	4
4	5	4	3	3	3	5	4	4	4	2	3	5	5	2	2	1	4	3	4	4	4	4	5	5	3	1	2	4	1	4	4	5	5	5	1	1	2	2	2	2	3	3	5	4	4	3	2	5	3
5	5	5	1	4	4	5	5	5	5	5	5	5	5	4	2	3	3	2	3	3	3	3	4	4	4	4	4	3	1	2	4	3	4	5	3	3	3	2	2	2	2	2	2	2	2	2	1	3	4
5	5	5	3	3	4	5	5	5	4	3	4	4	4	3	2	2	3	3	2	2	5	3	5	2	4	2	2	3	1	3	3	3	3	5	1	1	3	2	2	3	3	2	2	4	3	3	2	4	3
5	5	4	3	3	4	4	4	4	4	4	3	4	4	3	3	3	4	3	3	4	4	4	4	3	4	3	2	2	2	3	5	3	4	5	1	2	3	2	2	4	3	2	3	3	2	1	3	5	4
4	4	4	4	5	4	5	5	5	5	5	5	4	4	3	2	2	3	3	3	2	4	4	5	2	2	2	1	2	1	1	1	3	4	5	4	4	4	2	2	2	2	2	2	2	2	2	3	4	4
5	5	5	5	5	4	5	4	5	4	4	4	5	4	3	1	1	3	4	3	3	2	2	3	2	2	1	1	1	1	1	3	1	3	4	1	1	1	4	4	4	3	4	4	4	5	4	4	4	4
5	5	5	4	4	5	4	5	5	5	5	5	5	4	3	2	2	3	2	2	4	2	2	5	1	4	3	2	2	1	1	4	2	5	5	1	1	3	3	3	2	2	2	3	3	2	1	3	4	4
4	4	5	4	5	5	5	5	5	5	5	5	5	4	4	2	3	4	2	2	2	4	4	4	3	3	1	3	4	1	1	3	2	4	5	2	3	3	2	2	4	3	2	2	3	2	1	3	3	3
5	5	4	4	4	4	5	5	5	5	4	4	5	5	3	2	2	4	3	2	2	2	2	5	3	3	3	3	3	1	4	4	2	3	5	1	2	2	2	2	2	2	3	4	4	2	3	2	3	4
5	5	5	5	5	5	5	5	5	5	5	5	5	5	4	1	1	3	2	3	2	4	4	5	2	1	3	3	4	1	2	4	3	5	4	4	2	4	2	2	2	2	2	2	2	2	2	2	2	3
5	4	2	4	5	5	5	5	5	5	4	4	4	3	3	2	2	4	4	4	2	4	3	4	1	2	1	2	1	1	4	2	2	5	5	1	3	4	2	2	2	2	2	5	2	4	4	3	4	2
4	4	5	4	4	3	4	4	4	4	3	3	4	4	3	2	2	4	3	2	2	5	4	4	4	2	3	2	3	2	4	3	4	4	4	1	3	3	2	2	3	3	3	3	3	3	3	4	4	4
3	4	3	3	4	4	5	5	4	4	5	5	5	5	3	1	2	4	4	3	2	3	4	2	2	2	2	3	2	2	3	3	2	3	3	3	4	3	2	2	4	3	2	5	4	1	1	4	5	4
5	5	4	3	5	5	5	5	5	5	3	5	5	5	3	1	1	3	2	2	2	2	2	5	2	5	2	4	5	2	3	4	2	4	5	2	3	2	2	2	3	2	3	5	4	4	3	1	1	2
5	5	4	4	3	3	3	3	4	4	4	4	4	4	4	2	2	2	3	2	2	3	3	4	3	3	3	3	3	3	3	3	3	3	3	3	3	3	2	3	4	4	4	4	4	3	3	3	3	2
5	5	5	5	5	5	5	5	5	5	5	5	5	5	5	1	1	3	4	3	3	3	3	4	2	2	2	2	2	2	2	3	3	4	4	2	2	4	2	2	4	4	3	3	3	2	2	3	2	3
4	5	5	5	3	2	5	5	4	4	3	5	4	4	3	4	2	3	4	1	3	4	4	4	1	3	2	2	3	1	1	1	2	4	4	1	2	3	2	2	4	3	4	5	4	2	2	5	5	4
5	5	5	4	4	5	5	5	5	5	5	4	4	4	4	1	2	3	2	2	4	4	4	5	3	3	2	3	3	2	2	3	3	3	4	3	3	3	2	2	2	2	2	3	3	2	2	3	3	4
4	3	3	3	4	4	5	5	5	5	4	4	5	5	3	1	1	3	3	4	4	3	3	3	2	3	1	1	1	3	1	2	3	4	4	1	1	2	3	3	3	3	4	5	3	5	2	4	4	3
5	5	5	5	5	5	5	4	4	4	4	5	5	4	2	2	2	3	2	2	2	2	2	3	3	4	2	3	3	1	2	3	2	2	5	1	2	3	2	2	4	3	5	3	3	2	3	2	4	4
5	5	4	4	4	5	4	3	4	4	5	4	3	4	3	3	3	4	4	5	5	3	4	5	2	4	5	4	5	1	3	5	5	5	5	1	2	3	2	2	3	2	2	4	3	2	1	2	5	4
4	4	4	4	4	4	5	5	4	4	4	4	4	4	3	2	3	3	3	3	3	3	3	4	1	4	3	3	3	3	3	3	3	4	4	3	3	4	2	2	2	2	2	3	2	2	2	4	5	4
5	5	5	4	4	4	4	4	5	4	5	4	5	5	4	2	2	3	3	2	2	4	5	4	5	3	1	3	2	2	4	2	4	4	3	1	2	2	1	3	3	3	4	5	3	2	2	2	4	4
5	5	5	5	5	5	5	5	5	5	5	5	5	5	4	4	2	4	4	4	4	3	3	4	1	1	3	3	3	1	3	4	3	3	3	1	3	3	2	4	4	4	3	5	4	4	4	1	5	3
5	5	3	4	5	5	5	5	4	4	9	4	4	3	3	2	3	3	3	3	3	5	5	4	3	2	4	4	3	3	4	4	4	5	5	3	4	4	2	2	2	2	2	2	2	3	2	4	4	3
4	4	4	4	5	5	5	5	4	4	4	4	4	4	3	3	3	3	3	4	4	3	3	5	4	4	3	3	2	1	3	5	5	5	5	2	2	2	9	9	3	2	3	3	4	3	4	4	4	2
4	4	4	3	5	5	5	5	4	5	5	5	5	5	3	2	2	3	2	1	2	2	2	3	3	3	3	2	2	1	2	3	4	4	4	1	2	2	1	1	4	4	3	2	4	2	2	3	4	5
5	5	4	4	5	4	5	5	4	4	4	4	5	4	3	3	3	4	4	3	3	4	4	4	3	4	2	3	4	2	2	3	4	4	2	2	3	3	2	2	4	3	3	4	2	1	1	4	5	4
4	4	3	2	5	4	5	4	5	5	5	5	5	5	3	2	2	3	2	2	2	4	4	4	3	2	2	2	3	1	2	3	2	2	3	1	2	2	1	2	4	2	4	4	4	4	4	2	4	3
5	4	4	3	3	3	5	5	5	5	5	4	5	4	3	1	2	4	4	3	4	5	5	3	1	1	1	3	3	1	3	3	4	5	1	1	5	5	2	2	4	3	3	4	4	2	2	3	5	3
4	2	4	3	3	4	5	5	4	5	4	3	4	3	3	3	2	4	3	3	3	5	5	4	1	2	3	3	3	2	4	2	4	4	5	1	3	4	5	2	4	3	3	5	3	3	3	2	4	4
5	5	5	5	5	4	5	4	5	4	4	4	4	5	4	2	2	3	3	2	2	4	4	4	1	3	1	3	3	1	4	4	4	4	1	1	3	4	9	2	2	4	2	4	2	2	2	3	4	4
5	5	5	5	5	5	4	5	5	4	5	4	4	4	3	1	2	4	2	4	3	4	5	3	3	2	3	4	4	1	5	5	4	4	3	4	4	4	2	1	3	2	4	4	1	1	1	2	4	4
4	4	4	3	4	5	4	5	4	3	3	4	3	4	3	2	3	4	4	2	3	3	3	4	3	3	3	4	3	3	3	4	3	4	4	3	4	4	2	2	2	3	2	4	4	3	4	4	3	4
5	5	4	3	4	4	5	4	5	4	3	4	4	4	3	2	1	3	4	4	3	4	4	4	1	3	2	1	1	1	9	2	2	4	3	1	3	2	4	3	3	5	5	5	4	4	2	4	4	5
5	5	5	4	4	5	5	4	4	4	3	4	4	3	3	1	3	4	2	5	2	4	4	4	3	3	2	3	4	2	2	4	2	3	4	3	4	4	3	2	2	2	2	5	2	2	3	3	4	3
4	4	4	3	5	4	4	4	4	5	4	4	4	3	4	2	2	4	3	3	3	3	3	4	3	4	3	3	4	3	3	4	4	4	4	3	3	3	2	2	3	3	3	4	4	3	1	2	4	4
5	4	3	2	5	5	5	5	5	5	5	5	5	5	3	3	2	2	1	2	3	2	2	5	2	5	3	4	5	1	2	5	3	3	5	1	1	3	1	1	3	2	4	4	3	3	1	2	4	3
4	4	4	3	4	4	5	5	4	4	4	4	4	4	3	2	3	3	3	3	2	4	4	3	4	3	3	3	4	3	3	4	4	4	4	3	3	4	9	9	4	3	2	4	4	8	2	2	4	4
4	4	3	2	4	4	4	5	4	4	3	5	5	4	3	3	2	3	3	2	4	4	4	3	3	3	3	3	3	3	3	4	4	4	5	3	3	4	2	2	3	2	3	4	4	2	2	3	3	4
5	5	5	4	4	4	5	4	4	4	4	4	5	5	2	2	2	4	3	3	4	2	3	2	2	3	3	2	2	2	2	2	3	3	3	2	2	3	2	4	5	5	5	2	5	4	4	3	4	3
3	4	3	2	4	4	5	5	4	4	4	5	5	4	3	2	3	3	2	2	3	4	4	3	3	2	3	2	2	1	3	2	4	4	4	1	2	3	3	3	4	3	5	5	3	2	4	2	4	4
5	5	5	4	4	4	5	4	4	4	5	5	5	5	4	2	2	4	4	3	3	3	3	4	3	8	4	4	3	3	3	3	4	3	4	3	3	4	2	2	3	2	3	3	3	3	3	2	3	3
5	5	5	4	5	5	5	5	5	4	4	4	5	4	3	3	2	3	3	4	4	4	4	5	2	4	3	3	1	1	4	5	3	5	5	1	1	2	2	4	4	3	3	4	3	3	2	3	3	3
5	5	5	4	4	5	5	5	4	5	4	3	4	4	9	2	2	4	3	2	3	4	4	5	4	5	2	4	5	2	2	5	5	5	5	1	1	2	2	2	3	2	3	3	4	2	3	2	2	3
5	5	5	3	5	5	5	5	5	5	5	5	5	5	2	1	1	3	3	3	3	2	2	5	1	5	1	2	1	1	1	3	2	4	5	1	2	1	2	2	3	3	4	3	3	2	2	4	4	3
5	5	5	3	5	5	5	5	5	5	5	4	5	5	4	1	2	2	2	2	3	3	3	3	3	3	3	2	3	2	2	3	2	2	3	2	2	4	4	2	2	2	4	4	2	3	3	3	3	4
5	5	5	4	4	5	5	5	5	5	4	5	4	3	3	3	3	3	3	3	2	2	2	4	2	3	2	2	2	2	2	4	2	4	3	1	2	4	2	4	4	3	2	2	4	2	3	2	5	5
5	5	5	3	4	4	4	4	4	4	4	4	5	3	3	4	2	3	4	3	2	4	4	4	2	4	3	3	3	1	3	3	2	3	4	1	1	2	4	4	4	4	4	3	5	4	3	3	5	3
5	5	5	4	5	5	5	5	5	5	5	4	5	5	4	2	2	3	3	3	3	4	4	4	4	4	4	3	4	3	3	4	4	4	4	2	3	4	2	2	2	3	4	4	4	2	2	1	2	2
4	4	4	3	4	5	5	5	4	5	4	3	4	4	3	2	3	3	2	2	3	4	4	3	2	2	3	1	2	3	3	4	4	4	4	1	1	4	1	2	4	4	4	4	4	2	4	3	3	3
5	4	4	3	5	5	5	5	5	5	4	5	5	4	3	1	1	3	2	2	2	4	4	3	2	3	4	2	2	3	3	4	4	4	3	1	3	3	2	2	4	2	2	3	3	2	2	2	3	3
5	5	5	3	5	5	5	5	5	8	3	5	5	5	3	2	2	3	3	2	3	4	4	3	2	3	3	3	3	1	2	3	3	4	4	1	1	4	2	4	4	3	4	2	4	4	1	2	4	4
5	5	3	3	5	1	5	3	5	5	3	5	5	5	2	1	2	4	3	1	5	5	5	4	2	4	1	1	4	1	5	5	5	5	5	1	4	5	2	2	2	2	2	5	3	2	2	1	5	5
5	5	5	5	5	5	5	5	5	5	5	5	5	5	4	1	3	2	3	2	3	3	3	4	1	4	2	1	4	1	4	5	4	5	5	2	2	2	2	2	2	2	3	2	3	2	2	1	2	3
5	5	5	5	3	4	5	5	4	4	4	3	4	4	3	2	4	3	3	3	4	3	3	5	3	4	3	1	4	1	3	4	3	4	4	1	1	3	4	2	2	2	4	5	2	4	4	3	4	3
5	5	5	3	4	5	5	5	4	4	4	4	5	4	3	1	1	3	3	3	4	3	2	4	1	1	3	1	2	3	4	4	4	3	4	1	2	2	3	3	3	3	4	5	4	4	3	1	5	4
4	4	4	4	4	5	5	3	5	4	3	4	3	4	3	3	4	4	3	3	2	3	3	4	2	4	4	3	3	1	4	5	5	5	5	1	1	4	2	2	4	2	2	4	4	4	4	3	3	4
5	5	5	4	4	5	5	4	5	5	5	5	4	5	5	3	3	4	4	2	3	3	3	3	2	4	3	2	4	2	3	3	2	4	4	2	2	2	4	5	5	3	4	4	5	4	3	3	3	2
5	5	4	3	4	3	5	4	4	4	4	4	5	4	3	2	3	3	3	3	3	4	4	4	3	4	4	3	3	3	4	4	4	4	4	3	3	3	3	3	4	3	3	4	3	3	2	3	5	9
5	5	5	5	5	5	5	5	4	4	3	4	4	4	5	2	2	5	3	3	2	4	5	3	2	3	1	1	1	1	4	4	3	4	4	1	1	3	1	4	4	4	4	4	4	4	2	2	5	3
5	5	4	4	4	4	4	4	5	4	4	4	4	4	5	1	2	2	2	2	1	4	4	5	5	5	3	4	3	1	3	4	2	4	5	1	4	2	2	3	3	3	2	2	3	2	2	3	3	2
4	4	4	3	5	4	5	5	5	5	4	5	5	5	3	1	1	2	2	3	2	4	4	4	2	2	2	3	2	2	2	4	4	3	4	2	4	4	3	3	4	2	2	3	3	3	2	3	3	4
5	5	4	5	4	4	5	5	5	5	4	5	5	5	3	1	1	2	2	3	5	4	4	4	1	2	3	3	3	1	3	3	5	5	5	3	8	3	3	2	2	2	3	3	2	2	3	4	4	3
4	4	4	3	4	4	5	5	4	4	4	4	4	4	4	3	3	3	3	2	3	3	3	3	2	3	4	3	3	1	3	4	4	3	4	2	2	4	4	4	3	3	3	3	2	3	3	4	4	4
5	4	4	4	5	5	5	5	5	5	3	4	4	4	3	2	1	3	4	3	2	4	4	5	1	3	2	2	3	1	4	3	3	4	4	2	2	2	2	3	4	3	3	2	3	2	2	3	5	3
3	3	4	3	4	5	5	5	3	4	4	5	3	4	4	3	3	5	5	4	2	4	4	4	1	4	1	3	2	1	1	4	4	5	5	3	4	4	4	2	4	4	5	5	4	4	2	4	4	4
4	4	4	5	5	5	5	5	5	5	5	5	5	5	1	1	1	2	3	1	3	3	3	3	5	3	1	1	4	1	1	5	3	3	1	1	1	1	4	2	2	2	4	4	4	2	4	3	4	3
2	5	4	2	3	5	5	5	4	5	5	5	5	5	4	3	2	4	4	2	2	5	3	4	2	2	2	1	4	1	3	5	5	5	5	1	1	3	3	2	4	4	4	5	2	3	3	2	3	4
4	4	3	3	5	5	5	5	5	5	5	5	5	5	3	2	2	3	3	4	3	4	4	4	3	2	3	1	2	1	4	4	3	4	5	1	2	3	2	2	3	5	3	4	5	2	3	2	4	3
5	4	4	2	4	3	5	4	5	5	4	4	5	4	3	2	1	3	3	4	4	4	4	4	2	3	4	4	3	2	3	3	4	4	4	2	3	3	3	4	4	3	3	5	3	2	3	3	4	3
5	4	4	4	4	5	5	4	5	5	4	4	5	5	3	1	2	3	2	3	3	4	4	4	2	3	3	2	3	2	4	4	4	4	5	2	4	4	2	2	3	2	2	2	3	2	2	2	4	4
5	3	3	3	2	5	5	4	2	4	4	3	3	2	2	3	3	2	4	4	5	3	3	4	3	3	2	3	3	4	4	4	3	3	3	4	3	3	5	4	5	4	4	4	4	3	3	4	5	3
5	5	5	4	4	5	5	5	5	4	5	4	5	4	3	2	2	4	4	4	1	4	4	4	3	4	4	4	4	1	4	4	2	4	5	1	2	4	2	2	2	2	2	4	2	2	2	2	4	3
5	5	5	4	4	4	5	5	5	5	4	5	4	4	4	2	3	4	3	4	2	3	3	4	1	4	1	2	4	1	3	3	2	4	5	1	1	3	4	4	3	3	4	4	3	2	2	4	4	3
4	5	5	4	4	3	4	3	5	4	4	4	5	5	5	2	3	3	4	3	3	3	3	4	3	2	2	2	4	1	2	3	4	4	5	1	4	3	4	4	4	4	4	4	4	3	3	4	4	3
5	5	4	3	5	5	5	5	5	5	4	5	5	5	3	2	1	2	3	2	3	2	2	4	1	3	1	1	2	1	3	4	4	5	5	1	1	3	4	2	2	4	5	5	2	3	1	2	4	4
5	5	5	4	5	5	5	4	5	4	4	4	4	4	3	2	2	4	2	2	3	3	4	5	2	5	3	3	4	1	1	3	1	4	5	1	1	4	4	4	2	2	2	4	2	4	2	2	4	3
4	3	3	3	3	3	3	3	4	4	4	4	5	5	5	3	3	4	4	4	2	5	5	5	5	4	3	5	3	1	1	5	1	5	4	1	3	3	3	3	3	3	3	3	3	4	3	3	5	4
5	5	5	5	5	4	4	4	5	5	4	5	5	5	3	1	1	4	3	2	2	4	4	4	1	2	2	1	1	1	3	2	3	4	4	1	3	5	2	2	3	3	4	4	4	3	2	3	4	3
5	3	4	3	3	4	4	3	5	5	4	4	5	5	3	2	2	4	4	3	4	5	5	5	1	1	3	2	2	1	4	2	4	5	5	4	5	5	2	2	4	3	3	4	3	3	3	4	4	4
5	5	5	4	5	4	5	5	5	4	4	5	4	4	3	2	2	4	4	2	3	3	4	5	1	4	4	2	3	2	3	3	4	4	4	1	3	3	2	3	4	3	3	4	4	3	3	3	4	4
5	5	5	3	5	5	5	5	5	5	5	5	5	5	3	2	2	3	3	3	3	3	3	5	1	5	2	5	4	1	2	5	1	5	5	1	1	3	2	2	3	3	2	4	4	3	1	2	4	4
5	5	4	5	5	5	5	5	5	4	5	5	5	5	3	2	2	3	3	2	2	3	3	5	2	4	3	3	3	1	5	5	3	4	5	1	1	2	2	2	2	2	2	4	3	3	2	3	3	4
5	5	5	4	4	5	5	5	5	5	4	5	5	5	3	2	2	2	4	2	4	4	4	5	3	3	3	3	4	2	3	3	3	4	4	2	2	2	2	2	3	2	2	2	3	2	1	3	3	3
5	5	4	3	5	5	4	4	5	5	4	4	5	5	3	2	3	3	3	4	2	4	5	5	2	3	4	3	2	2	4	4	5	5	5	2	5	4	2	2	2	2	2	9	2	9	9	4	4	3
4	4	4	3	4	4	5	5	4	5	5	5	4	5	4	2	2	4	3	2	2	4	5	4	1	2	3	3	3	1	5	4	4	4	4	2	3	4	2	3	3	2	2	5	3	3	4	2	4	4
5	4	4	4	5	5	5	5	5	5	5	5	5	5	3	1	1	2	2	3	3	1	1	4	2	3	4	3	3	1	2	4	4	4	5	2	2	4	2	2	4	4	4	5	4	2	1	2	3	4
5	5	5	4	5	5	5	5	4	4	3	3	3	4	3	3	3	4	3	4	4	3	3	3	3	3	3	3	3	3	3	3	3	3	4	3	3	4	3	3	2	2	3	4	2	4	2	4	5	4
5	4	4	4	5	5	5	5	5	5	9	4	5	3	3	2	3	5	4	4	3	3	3	5	3	5	1	4	3	1	4	4	3	5	5	3	4	4	2	2	4	4	4	5	2	4	2	3	5	3
4	4	4	5	5	5	5	5	4	5	5	5	5	4	4	2	2	3	3	2	2	3	3	4	2	3	2	3	2	1	1	3	4	4	4	1	3	3	3	4	5	4	4	4	4	4	3	3	3	3
5	5	5	4	5	5	5	5	5	4	5	5	5	5	5	1	4	3	4	3	1	5	4	4	1	3	1	1	2	1	2	2	4	4	4	1	3	3	2	1	4	4	3	4	5	4	4	3	3	4
4	4	5	3	4	5	5	4	5	5	4	5	5	4	3	2	2	4	5	2	2	3	3	2	2	4	4	3	4	1	2	5	3	4	5	1	2	4	1	4	4	3	4	3	4	3	2	3	4	4
4	5	5	2	4	5	5	5	5	3	4	4	4	5	1	1	1	5	4	2	3	1	1	4	4	2	2	4	4	2	2	5	4	5	5	5	5	2	2	2	2	2	3	4	2	2	1	3	3	2
5	5	5	5	5	5	5	5	5	4	4	5	5	5	4	1	2	3	3	3	3	4	4	4	3	4	2	3	3	2	2	4	2	5	4	2	2	1	2	2	2	2	4	4	2	2	2	3	4	4
5	5	4	5	5	4	5	5	5	4	4	4	5	5	2	1	2	5	4	2	2	3	3	4	2	3	2	3	4	3	2	5	4	3	5	2	3	3	2	2	2	2	2	5	2	2	2	3	3	4
4	5	5	3	3	5	5	5	4	4	4	4	4	4	9	1	2	3	3	3	3	4	4	5	8	5	2	4	4	2	3	4	4	4	5	3	2	3	2	2	4	3	3	2	4	2	2	3	4	4
5	5	3	4	4	5	5	5	5	5	4	4	4	4	4	2	3	4	3	1	1	3	3	5	4	4	5	5	3	1	5	5	3	4	5	2	2	3	2	2	2	2	2	3	3	1	1	2	3	3
5	5	5	3	3	5	5	5	4	4	4	5	4	4	3	3	4	4	4	2	2	3	4	4	3	5	3	4	3	1	2	5	3	4	5	2	3	2	4	2	2	3	3	5	2	3	2	4	5	4
5	5	5	4	5	5	4	5	5	4	4	4	5	5	3	2	2	3	3	2	2	4	4	5	1	2	1	1	2	3	1	2	3	4	5	1	2	4	3	3	4	2	2	2	4	3	2	2	5	4
5	5	5	4	5	5	5	5	5	5	5	5	5	4	3	1	2	3	3	3	3	3	3	5	3	3	1	1	1	1	1	5	4	3	5	1	1	4	2	2	4	4	4	2	4	4	2	3	4	4
5	5	5	5	5	5	5	5	5	5	5	5	5	4	3	1	2	3	3	2	4	3	3	4	3	4	1	4	2	1	1	5	3	3	5	3	3	3	2	2	2	2	3	4	4	3	3	4	3	4
4	4	4	4	5	4	5	5	5	4	4	4	5	5	3	2	2	3	3	3	3	3	3	3	3	3	3	3	3	3	3	3	3	3	3	3	3	3	4	3	2	3	3	3	3	3	3	4	4	3
5	5	5	4	5	5	5	9	4	4	4	4	4	4	2	2	2	2	3	2	2	4	4	5	3	3	3	4	3	3	3	4	2	3	5	2	2	3	2	2	4	4	4	4	3	2	2	3	4	4
5	4	4	5	4	4	4	5	5	2	3	3	4	4	5	2	3	4	2	5	4	3	3	5	3	5	2	5	5	2	1	5	3	4	4	3	2	3	1	2	5	3	3	4	5	5	4	4	4	4
5	5	5	4	5	5	5	5	5	5	4	5	5	5	9	1	1	2	1	1	2	4	4	4	1	3	1	1	3	1	3	4	4	4	4	1	1	3	2	2	4	2	2	2	2	2	2	4	4	4
5	5	3	3	3	4	5	3	3	3	3	3	3	4	3	1	3	4	4	3	3	4	4	5	4	5	3	3	3	3	3	4	4	4	5	3	3	3	2	2	2	3	3	5	4	3	3	4	4	4
4	4	3	2	5	5	5	5	5	5	4	4	5	4	3	1	2	2	3	3	2	4	4	4	2	2	2	2	2	2	3	2	3	4	2	2	2	3	5	4	2	3	5	5	4	4	2	2	4	4
4	4	4	4	5	4	5	5	4	4	4	4	4	4	3	2	2	4	4	3	4	3	3	4	3	4	3	3	4	4	3	4	3	5	5	3	3	5	2	2	2	2	2	2	3	2	2	4	5	5
5	5	5	4	4	4	5	4	5	4	3	4	5	5	3	1	1	3	3	2	3	4	4	5	2	4	3	3	5	1	3	4	3	5	5	1	3	3	2	2	2	2	4	4	3	2	1	2	3	4
5	5	4	3	4	4	5	4	5	5	4	4	5	5	2	3	2	4	2	3	3	2	2	5	4	5	3	4	5	3	5	5	4	5	5	1	1	3	2	2	3	2	3	2	3	4	3	2	2	3
5	5	4	5	5	5	5	5	5	5	5	5	4	5	2	1	2	3	1	4	3	1	1	5	1	4	4	1	4	1	1	4	1	4	5	1	1	4	3	3	4	3	2	3	4	3	3	2	4	4
5	5	5	5	5	5	5	5	5	4	4	5	4	4	3	1	4	3	3	2	2	3	4	4	2	3	4	2	3	1	3	4	3	5	4	1	2	3	3	5	2	4	5	4	5	5	4	2	1	2
5	5	5	4	5	4	5	4	5	4	4	5	5	4	3	3	2	3	9	4	5	4	4	3	2	3	3	3	4	2	4	4	4	5	4	1	2	3	2	4	4	5	4	4	4	4	2	3	4	4
5	5	5	3	4	4	5	4	4	5	5	5	5	5	3	2	2	3	3	3	4	4	1	5	4	5	1	4	1	1	5	5	5	5	5	1	5	5	4	8	4	8	2	5	5	2	2	3	3	4
4	4	3	3	4	4	4	4	4	5	5	4	4	4	3	2	3	3	3	3	3	4	4	5	3	5	3	3	5	2	2	5	4	4	5	2	3	3	1	1	5	4	3	1	5	1	1	3	4	5
5	5	5	3	5	5	5	5	5	5	5	5	5	5	3	2	2	4	2	2	4	5	5	3	1	2	2	1	1	1	5	3	5	5	4	1	2	3	4	4	4	4	4	8	4	2	1	2	4	5
5	5	4	4	4	4	5	5	5	4	3	3	5	5	3	2	2	4	3	3	4	3	4	4	2	2	3	2	2	2	3	4	4	5	5	1	2	5	3	3	4	4	4	4	4	4	1	3	5	4
4	4	3	3	4	5	5	5	4	4	5	5	5	5	4	2	2	5	5	4	4	4	3	4	2	3	2	2	4	2	2	4	4	4	4	2	2	2	4	4	4	4	4	3	5	3	5	4	4	4
5	5	5	3	3	5	5	4	5	4	4	4	5	4	3	3	3	3	4	2	2	4	4	5	4	5	3	2	2	1	2	4	5	5	3	1	2	5	4	2	4	2	3	3	4	3	3	3	4	3
5	4	4	4	4	5	5	4	4	3	3	4	5	4	3	3	2	3	4	2	2	4	4	4	4	9	3	4	3	3	4	4	4	4	3	2	4	5	4	2	4	2	2	1	5	2	1	4	4	3
5	5	5	3	3	4	5	5	5	5	5	5	5	4	3	1	2	8	4	4	2	5	5	5	1	1	1	1	1	1	1	5	5	5	5	1	5	5	3	3	3	3	4	4	3	3	3	2	4	4
5	5	4	4	4	4	4	4	4	4	3	4	4	3	3	2	2	3	3	2	2	4	4	5	4	4	4	4	5	4	5	5	4	5	4	3	3	4	3	3	3	2	2	3	3	2	2	3	4	3
5	5	5	5	5	5	5	5	5	5	4	5	5	5	2	1	1	3	3	2	2	3	1	4	1	1	4	1	1	1	4	4	5	5	5	1	1	4	2	2	4	4	3	5	4	4	4	3	3	4
4	4	3	3	4	5	5	4	4	4	4	5	4	4	3	3	3	3	4	2	2	3	4	4	3	4	4	4	4	2	3	4	5	5	4	2	3	4	4	2	2	2	3	5	4	3	1	3	5	4
4	4	4	4	4	4	4	4	5	5	5	5	4	4	3	2	2	4	4	3	4	3	3	5	2	2	4	9	3	3	4	4	5	5	5	3	4	4	2	4	4	4	4	4	4	4	2	4	3	4
5	4	5	5	5	5	4	4	4	4	4	4	5	4	3	2	2	4	3	4	4	4	4	2	1	2	4	4	4	2	2	2	4	4	4	2	2	4	2	2	4	4	4	4	5	2	4	3	5	2
5	5	5	4	5	5	5	5	5	5	4	5	5	5	2	1	1	4	4	2	4	4	4	5	2	3	2	4	4	1	3	3	3	4	4	1	4	4	2	2	2	2	2	3	3	4	3	3	2	4
5	5	4	3	3	4	5	4	5	5	4	4	5	4	3	2	3	4	2	2	4	4	4	5	4	4	3	3	4	2	4	5	3	4	5	2	4	4	2	3	2	3	3	4	3	2	2	3	4	3
5	5	4	3	4	4	4	5	5	5	3	4	4	4	2	2	2	3	3	4	4	4	4	5	3	3	3	3	3	3	3	4	3	4	5	3	3	4	3	3	3	3	3	2	3	2	2	4	4	4
5	5	5	4	5	5	5	5	4	4	5	5	5	5	4	2	3	4	3	3	4	5	5	4	3	3	4	8	3	1	4	9	4	5	5	5	5	5	2	3	2	2	4	4	4	2	4	2	4	3
5	5	5	3	4	5	5	5	5	4	4	5	5	4	3	2	2	3	3	3	2	4	3	5	3	4	5	3	3	3	4	5	3	4	5	2	2	4	2	3	3	2	2	2	3	2	1	3	3	3
5	5	5	3	4	5	5	5	5	5	4	4	5	5	4	1	1	3	2	3	2	4	4	4	2	3	2	3	4	1	3	4	2	4	4	1	3	4	2	2	4	4	3	3	4	2	2	3	3	4
5	5	3	3	4	5	5	5	5	5	3	4	4	5	3	3	2	3	3	2	3	3	3	5	3	5	4	3	5	3	4	4	3	4	9	2	3	3	2	2	2	2	3	4	2	4	2	4	4	5
5	5	3	3	4	5	5	5	4	4	3	4	4	4	4	3	3	3	3	3	2	4	4	5	4	5	4	3	3	1	1	5	5	5	5	2	2	4	2	2	2	2	2	5	4	2	2	3	5	5
5	4	3	4	5	5	5	5	5	5	4	5	5	5	3	2	2	3	3	1	2	3	3	5	2	4	3	3	4	1	2	4	4	4	5	1	3	4	4	2	2	2	3	4	3	2	2	2	3	4
4	4	5	4	4	5	5	5	5	5	4	5	5	5	3	2	2	3	4	3	3	4	4	4	3	2	4	4	3	1	3	4	3	4	5	1	2	3	4	4	2	3	4	4	4	4	4	2	3	3
4	5	4	3	5	5	5	5	5	5	5	5	5	5	2	2	2	4	4	3	2	4	3	3	2	4	1	5	1	1	2	5	4	3	5	1	1	2	2	2	4	2	3	3	4	5	5	4	5	5
5	5	5	5	5	5	5	5	5	5	5	5	5	5	3	1	3	3	4	2	2	3	3	4	1	2	1	2	1	1	2	4	3	4	5	1	1	3	1	3	3	4	5	5	4	3	3	5	5	4
5	5	4	4	5	5	5	5	5	5	5	5	4	4	4	3	2	3	2	3	2	4	4	5	5	4	3	3	5	3	4	5	3	5	5	2	2	4	2	1	2	2	2	2	2	2	2	4	5	3
5	5	3	5	5	5	5	5	5	4	4	5	5	5	3	1	2	3	3	2	2	4	4	4	3	4	3	4	5	1	2	5	4	5	5	1	3	4	1	1	2	2	2	2	3	5	2	3	4	4
5	5	5	5	3	5	5	4	4	5	4	2	3	4	3	2	3	4	3	2	3	5	4	5	3	4	2	3	2	1	3	4	2	4	5	1	3	4	4	2	2	2	2	5	2	3	5	4	5	5
5	5	5	3	3	4	5	5	4	4	4	3	4	4	3	2	3	2	3	2	2	4	4	5	1	3	1	1	1	1	5	5	5	5	5	1	4	3	3	2	3	4	4	4	3	2	1	1	4	5
5	5	5	5	5	5	5	5	5	5	4	5	5	5	3	1	1	3	3	3	2	4	4	4	4	3	3	2	2	1	3	3	2	5	4	1	1	4	2	2	2	2	2	2	2	3	2	3	4	4
5	5	5	4	5	5	5	5	5	4	4	5	5	5	4	2	3	4	3	2	3	4	4	5	3	4	2	2	4	3	3	3	4	5	5	1	2	4	2	2	2	2	2	2	3	2	2	3	4	5
5	5	5	4	5	5	4	5	5	5	5	5	5	5	3	1	1	2	3	2	2	4	3	4	2	3	3	3	3	3	4	3	3	4	1	1	3	4	2	2	9	3	3	4	3	2	2	4	5	4
5	5	5	3	5	5	5	5	5	4	4	5	5	5	4	1	4	4	5	1	4	5	5	4	1	1	1	1	1	1	1	1	3	3	4	2	3	4	2	5	5	5	5	5	5	5	5	4	3	4
5	5	4	4	5	4	5	4	5	5	5	4	5	5	4	3	3	3	3	2	2	4	4	5	3	3	2	3	2	4	3	4	3	5	5	1	4	4	2	2	2	2	2	4	4	4	2	2	4	4
5	5	4	3	5	5	5	5	5	3	4	5	5	5	4	2	3	3	3	3	4	5	5	5	4	3	4	4	4	2	5	5	4	5	5	2	3	5	2	2	2	2	2	5	2	2	1	4	4	3
5	4	4	3	4	5	4	4	5	5	4	4	5	4	3	2	2	3	3	2	2	3	2	5	2	2	4	3	4	3	5	4	2	4	5	3	3	3	3	4	3	3	2	4	3	3	2	4	4	3
5	5	5	5	5	4	5	4	4	4	5	4	5	4	5	1	1	3	3	4	5	4	5	5	3	4	2	2	5	1	5	5	5	5	3	1	1	5	4	4	2	2	2	4	4	2	2	4	4	4
5	5	5	5	5	5	5	5	5	5	4	5	5	5	3	1	2	3	4	3	2	3	3	5	2	1	2	3	2	1	1	2	4	5	4	1	5	4	2	3	4	4	4	4	4	3	4	2	4	3
5	5	5	4	4	5	5	5	5	5	4	3	5	5	3	1	1	3	2	2	2	4	4	5	2	4	3	3	2	1	1	4	5	5	5	1	1	2	2	2	4	2	1	3	2	3	2	2	5	5
4	4	4	5	4	5	5	5	4	5	4	5	5	5	2	1	2	3	3	2	3	3	3	4	3	4	3	3	3	1	1	3	2	4	4	2	2	3	4	4	4	4	4	4	4	4	4	2	3	4
5	5	4	4	5	5	5	5	5	5	4	5	5	5	3	1	1	3	3	3	2	3	3	5	3	5	1	3	5	1	5	5	3	5	5	1	1	3	2	2	3	2	2	5	4	1	1	2	5	4
5	5	3	3	5	5	5	5	4	4	3	4	3	4	2	2	2	4	4	4	2	4	4	4	4	5	3	5	3	3	4	5	5	5	5	2	3	5	2	2	2	2	2	2	3	4	2	4	2	4
5	5	5	3	5	5	5	4	5	4	5	5	5	4	2	2	2	4	3	2	2	4	4	4	3	4	3	3	3	3	3	4	4	4	5	1	3	4	2	3	2	3	4	3	2	2	3	1	3	4
5	4	4	4	5	5	5	5	5	5	4	5	5	5	3	1	2	3	2	2	2	3	3	5	2	3	1	3	4	1	3	4	3	4	5	4	4	4	2	2	3	3	3	4	3	3	3	1	4	4
4	4	4	4	3	3	5	5	5	5	4	4	5	4	3	1	2	3	3	3	2	5	5	4	3	3	3	4	4	2	4	4	5	5	5	3	3	4	3	3	3	2	3	3	3	2	2	4	4	3
4	4	5	5	4	5	5	4	5	4	5	4	5	5	4	2	2	3	4	3	2	3	3	4	4	2	4	4	4	1	2	5	3	3	5	1	3	4	2	3	4	4	4	2	4	2	2	5	4	3
5	4	4	5	5	4	5	5	5	5	5	5	5	5	4	2	3	4	3	3	4	4	4	5	3	4	1	3	2	1	3	4	3	3	5	3	3	4	3	3	4	4	4	4	4	4	4	2	4	3
5	5	5	5	5	5	5	5	5	5	5	5	5	5	2	2	2	3	4	3	3	3	3	4	3	4	3	3	4	3	4	4	3	3	5	3	3	3	2	2	2	2	2	2	4	2	2	4	4	4
5	5	4	4	5	5	5	5	5	4	5	5	5	5	3	2	2	3	3	3	4	4	4	4	3	3	2	1	3	1	1	3	3	4	4	2	3	4	2	4	4	4	4	4	4	4	3	4	4	4
5	5	5	4	5	5	5	5	5	5	5	5	5	5	4	1	2	2	2	2	3	4	5	5	1	5	1	1	1	1	1	3	1	5	5	1	1	3	3	3	3	2	4	4	4	4	3	4	4	5
5	9	5	4	4	5	5	5	5	5	4	4	4	4	4	1	1	9	2	3	5	9	9	5	4	4	4	4	4	3	3	5	9	5	5	3	3	5	5	5	5	4	4	1	3	1	2	4	4	4
5	5	5	4	4	5	5	5	5	5	5	5	5	5	3	1	2	3	3	3	3	4	4	4	2	3	3	3	2	3	3	4	3	4	4	2	3	4	4	4	4	3	2	4	4	3	9	4	4	3
5	5	5	4	3	4	5	5	5	5	4	4	5	5	4	1	1	3	4	3	2	4	4	5	2	3	2	2	5	2	4	5	4	5	5	2	2	3	2	2	4	2	2	4	2	3	2	2	4	5
5	5	5	4	5	4	5	5	5	5	5	5	5	5	5	1	1	4	1	4	3	4	4	5	2	3	3	3	3	2	3	5	5	5	5	2	2	4	2	2	2	2	2	2	2	2	2	4	5	4
4	4	5	4	2	5	5	5	5	4	3	3	5	5	4	1	1	4	5	2	1	5	5	5	4	4	3	5	3	3	4	5	2	3	4	1	1	3	2	3	3	4	4	4	4	4	2	4	4	4
5	5	5	5	5	5	5	5	5	5	5	4	4	5	2	2	2	3	3	2	2	2	2	3	5	3	2	2	2	2	3	4	3	4	4	3	4	3	2	2	4	2	4	3	3	2	4	2	4	3
5	5	5	4	5	5	5	5	5	4	5	5	5	5	4	3	3	3	3	3	4	3	3	5	3	4	5	3	3	3	2	4	4	5	5	2	2	4	2	2	3	2	3	3	3	2	2	3	5	5
5	5	5	4	5	5	5	5	5	5	5	5	5	5	3	1	1	3	4	2	2	3	3	4	1	4	3	2	2	2	4	4	2	4	4	1	1	1	2	3	3	3	3	3	4	3	4	4	5	4
5	5	5	5	5	5	5	5	5	5	5	5	5	5	2	1	1	2	4	2	3	4	4	4	4	3	4	4	4	2	4	4	3	4	4	3	4	4	2	2	2	2	2	2	2	2	2	2	2	2
4	4	4	4	5	5	5	5	5	4	4	5	5	5	3	1	2	2	3	1	1	3	3	5	3	4	4	1	3	1	3	5	1	5	5	1	1	1	3	3	4	4	4	3	4	3	2	4	3	3
5	5	5	4	4	4	5	5	5	5	4	5	5	5	3	2	2	3	3	3	2	3	3	4	2	3	3	4	4	4	3	4	4	4	4	2	3	4	1	9	4	4	4	4	3	3	3	4	5	3
5	4	3	1	5	5	5	5	5	5	5	5	5	5	3	2	2	2	1	2	2	3	3	5	3	5	4	3	4	2	2	4	4	4	5	2	2	3	2	4	4	4	1	3	4	3	1	2	4	4
5	5	4	4	5	5	5	5	5	5	5	5	5	5	4	2	2	3	3	2	2	4	4	5	4	4	3	3	3	1	9	5	5	5	5	1	4	4	2	2	2	2	5	5	2	3	1	2	4	4
5	5	3	4	4	5	5	5	5	4	4	4	4	5	4	1	1	2	3	2	4	5	5	5	2	3	3	2	3	2	2	2	3	4	4	2	2	2	4	4	4	4	4	5	4	4	4	2	5	3
5	5	5	4	5	5	5	5	5	5	4	5	5	5	2	2	2	2	2	2	2	2	2	5	2	5	4	2	2	2	3	5	3	3	5	1	1	3	4	4	4	4	4	4	4	2	2	4	4	5
5	5	5	5	5	5	5	5	5	5	5	5	5	5	4	1	2	3	3	2	2	4	4	5	5	9	1	3	3	1	3	4	4	3	5	1	1	4	2	2	5	2	2	5	5	2	1	4	4	4
5	5	5	5	5	5	5	5	5	5	4	5	5	5	2	2	2	2	2	4	3	3	3	5	3	5	2	3	4	2	2	5	5	5	5	1	1	2	2	2	4	3	4	4	5	5	4	2	3	3
5	5	5	5	5	5	5	5	5	5	5	4	5	5	2	2	2	2	3	3	4	3	3	5	3	3	4	2	2	1	2	3	2	5	4	1	3	5	3	3	5	4	2	4	4	5	5	4	3	3
5	5	5	5	4	4	5	5	5	5	5	5	5	5	4	1	3	3	3	4	3	5	5	5	4	4	4	5	5	3	5	3	3	5	3	1	4	3	2	1	3	4	3	3	4	1	1	3	3	5
5	5	5	5	5	5	4	4	5	5	5	5	5	4	3	1	1	3	3	2	3	4	4	4	1	5	1	5	4	1	5	4	4	4	4	1	1	2	2	2	2	3	4	4	2	2	2	4	4	5
5	5	4	4	5	5	5	5	4	4	4	4	4	4	3	2	2	3	3	1	2	4	3	5	4	4	1	3	5	1	3	4	3	5	5	3	3	3	2	3	3	2	4	3	4	4	2	4	4	4
5	5	3	4	4	5	5	5	5	4	3	4	5	5	3	2	2	2	2	2	2	1	1	5	4	4	4	3	4	3	4	4	5	5	5	1	3	4	2	2	4	4	4	5	4	4	2	3	4	4
5	5	5	5	4	4	5	5	5	4	4	4	4	4	5	2	2	3	3	4	3	4	4	4	3	3	3	4	4	3	3	4	4	4	4	3	3	4	2	4	2	4	4	3	4	4	4	4	4	4
5	5	5	4	5	5	5	5	4	4	3	4	4	5	4	2	3	3	3	4	3	4	4	5	4	5	4	3	5	2	3	4	4	5	5	2	2	3	4	4	3	3	4	4	3	3	2	3	5	4
5	5	4	3	4	4	4	5	4	4	4	4	4	4	3	2	2	3	3	2	2	4	4	5	1	4	2	3	3	2	2	3	3	5	5	1	2	5	3	3	4	4	4	4	4	4	4	4	5	4
5	5	5	5	5	5	5	5	5	4	4	4	4	4	9	2	2	3	3	2	3	4	4	5	1	4	2	4	4	2	2	4	3	4	4	4	3	3	4	3	3	3	4	5	4	4	4	4	4	3
5	5	5	5	5	5	5	4	5	4	4	5	5	4	4	2	2	3	4	4	4	4	4	5	4	4	3	4	5	3	4	4	3	4	5	4	4	3	4	3	3	3	5	5	3	4	3	2	3	3
5	5	5	5	5	5	5	5	5	5	5	5	5	5	1	1	1	3	3	2	2	4	4	4	4	4	3	4	3	3	4	4	4	4	4	3	3	4	2	2	8	5	3	3	8	2	2	4	3	3
5	5	5	3	5	5	5	5	5	5	4	5	5	5	3	1	2	3	2	2	1	3	3	4	3	4	4	2	2	2	3	5	3	5	5	2	2	3	2	2	4	4	4	4	4	1	3	3	4	4
5	5	5	3	5	5	5	4	5	5	4	5	5	5	2	2	1	4	4	3	4	3	3	5	2	4	5	4	5	2	4	5	5	5	5	2	3	3	2	2	2	2	2	3	3	2	2	4	5	4
5	5	5	4	4	4	5	5	5	4	3	5	4	4	3	2	2	3	3	2	3	3	3	4	2	3	3	4	3	2	3	4	5	4	5	2	2	4	3	4	4	4	4	4	4	4	4	4	4	5
5	5	5	3	4	5	5	5	5	5	3	4	4	4	3	2	2	3	4	2	2	4	4	5	3	4	4	4	4	3	5	4	4	4	5	3	3	4	2	2	4	3	3	4	3	2	2	3	4	4
5	5	5	3	4	4	4	4	5	5	5	5	5	5	3	2	2	3	3	4	4	4	4	4	4	3	4	4	4	3	4	4	4	4	4	4	4	4	2	2	5	4	4	2	2	2	2	4	4	4
5	5	5	5	4	4	5	5	4	4	4	5	5	5	3	1	1	2	3	3	3	4	5	5	1	2	1	3	2	1	3	5	5	5	5	1	5	5	2	3	2	2	4	4	5	5	3	2	4	4
5	5	5	5	4	4	5	5	4	4	3	4	4	4	3	3	2	4	3	3	4	4	4	5	2	4	4	2	4	2	3	4	4	5	5	2	2	3	2	2	4	4	4	4	4	3	3	5	5	5
5	5	4	3	5	5	5	5	5	5	5	5	5	5	2	2	1	3	2	3	2	3	3	5	3	5	5	5	5	2	4	5	3	5	5	1	1	2	2	2	2	2	2	2	3	2	2	3	5	4
5	5	5	5	5	5	5	5	5	5	4	4	4	4	2	2	3	3	3	3	2	4	4	3	2	3	3	4	4	2	3	4	4	5	5	2	4	5	4	4	5	4	4	5	2	3	1	4	4	3
5	4	5	5	4	4	4	4	5	4	4	4	4	4	3	2	2	4	4	4	2	4	4	4	3	4	3	3	4	3	4	4	3	4	5	3	4	5	5	4	4	4	4	3	4	3	3	4	3	4
4	4	4	4	4	4	4	4	5	5	4	5	4	4	3	2	2	4	4	3	4	3	3	5	3	3	4	4	4	3	4	4	4	5	5	3	4	5	2	4	4	4	4	4	4	4	2	4	4	4
5	5	5	5	3	3	4	4	5	5	5	3	5	5	3	3	1	3	3	3	3	5	5	5	3	3	5	5	3	3	3	3	3	5	5	3	3	5	2	2	3	4	4	4	3	3	1	4	4	4
5	5	4	3	4	4	5	5	4	4	4	5	4	4	4	2	3	3	3	3	3	4	4	4	4	4	4	4	4	3	4	4	4	4	4	3	4	4	3	4	4	3	4	3	4	4	3	4	4	4
5	5	4	5	4	4	5	5	5	5	4	5	5	5	3	2	1	2	4	8	2	3	3	5	1	5	4	1	3	1	2	2	2	5	5	4	9	5	4	5	5	2	3	5	5	5	4	3	5	2
5	5	5	5	5	5	5	5	5	5	3	5	5	5	2	1	1	3	3	3	1	4	4	4	3	2	4	4	4	1	3	4	2	4	4	3	4	2	4	2	2	4	4	4	4	3	3	4	4	2
5	4	5	3	5	5	5	5	5	5	5	5	5	5	3	3	2	2	2	2	2	5	5	5	3	5	2	2	5	2	2	5	4	5	5	2	2	4	1	2	4	2	2	2	3	2	1	4	5	4
5	5	3	4	5	5	5	5	5	5	5	5	5	5	3	1	2	3	2	2	2	4	3	5	3	4	4	5	5	1	4	5	5	5	5	1	3	5	2	2	2	2	4	2	3	2	8	2	3	4
5	5	4	4	4	5	5	5	5	4	3	4	4	5	4	2	3	3	3	4	3	4	4	5	3	5	4	5	5	2	5	5	4	5	5	2	2	5	3	3	3	3	3	5	4	4	3	3	4	4
5	5	5	4	4	5	5	4	4	3	4	4	4	4	5	2	2	3	2	2	2	3	4	4	3	2	4	1	5	1	4	4	3	5	5	1	3	3	4	4	5	4	4	5	4	3	4	3	4	4
5	5	5	4	4	5	5	5	5	5	5	5	5	4	4	1	1	4	4	4	2	3	4	3	2	3	3	3	4	3	5	3	4	5	5	3	3	4	2	5	5	5	5	4	3	4	1	3	4	3
5	5	3	4	5	4	5	5	4	4	5	5	5	5	2	1	2	3	4	4	1	4	4	5	5	5	3	3	2	4	5	4	4	5	5	3	5	4	2	2	4	2	4	5	4	3	2	2	3	5
5	5	5	5	4	5	5	5	5	5	4	5	4	3	3	1	3	4	3	3	3	3	3	3	3	4	3	3	3	3	3	3	3	5	5	3	3	4	3	4	4	3	3	3	4	4	4	3	5	4
5	5	5	5	5	4	5	5	5	5	4	5	5	5	2	2	2	1	2	1	1	4	4	5	1	5	1	2	2	2	1	3	3	3	5	1	1	1	3	4	3	4	4	5	4	2	2	4	5	3
5	5	5	4	5	5	5	5	5	5	5	5	5	5	3	2	2	3	3	2	4	5	5	4	3	3	2	3	3	1	5	5	3	5	5	1	3	3	2	4	5	5	5	4	3	4	2	3	3	5
4	4	4	3	4	5	5	5	5	5	5	5	5	5	3	2	3	4	3	4	4	3	3	5	3	4	4	5	4	3	3	5	4	5	5	3	3	4	2	3	4	3	4	5	4	4	4	4	4	3
5	4	4	5	5	4	4	4	5	5	4	5	5	5	1	1	1	4	4	3	2	4	4	4	2	2	2	2	2	2	2	3	3	4	5	5	5	4	1	4	5	5	3	5	5	3	3	3	4	4
5	5	5	3	5	5	5	5	5	5	4	5	5	5	4	2	2	4	3	4	3	4	4	5	4	4	3	4	4	1	4	5	5	5	5	1	3	5	4	2	2	2	2	5	4	5	3	4	4	5
5	5	5	5	5	4	5	5	5	5	5	5	5	5	4	2	2	3	3	2	2	4	4	5	2	3	4	3	4	2	3	5	4	3	5	3	4	4	3	5	4	3	4	5	4	3	3	2	3	3
5	5	5	5	4	4	4	4	4	4	3	3	4	4	3	3	4	2	3	3	3	4	4	5	4	4	5	4	4	3	5	5	4	5	5	5	5	5	4	4	3	3	4	4	3	2	2	4	3	3
5	5	5	3	4	5	5	5	5	5	5	4	5	5	2	2	1	2	2	2	2	3	3	4	1	4	4	2	3	1	2	2	4	5	5	1	3	5	5	3	4	4	4	5	4	3	3	2	5	5
5	5	4	3	5	4	5	5	5	5	4	4	5	5	4	1	1	1	1	1	3	5	5	5	3	5	3	1	5	2	1	5	3	5	5	3	2	1	2	2	4	4	4	3	4	3	2	3	4	5
4	4	5	3	5	4	4	5	5	5	4	4	5	5	3	2	2	3	3	2	3	3	3	5	3	4	3	4	3	3	4	5	4	4	5	3	4	3	3	4	4	4	4	4	4	4	4	4	4	4
5	5	5	4	5	4	5	4	5	5	4	4	5	5	3	2	2	2	2	2	3	5	5	5	3	4	4	3	2	3	4	4	3	5	5	1	4	4	2	2	2	2	2	5	4	5	2	4	4	4
5	5	5	4	5	5	5	5	5	4	4	5	5	4	3	1	1	3	2	1	2	5	5	5	3	5	5	1	5	1	5	5	5	5	5	1	5	3	4	3	2	2	3	4	2	4	4	2	4	4
5	5	5	5	4	5	5	5	4	5	3	4	5	5	2	1	1	3	4	2	1	5	5	5	5	5	5	5	3	3	4	5	3	4	5	3	3	3	2	2	3	3	4	4	3	1	1	1	3	4
5	5	5	5	4	4	4	4	5	5	4	4	5	4	2	1	1	3	3	2	2	3	3	5	3	4	3	4	5	1	3	5	4	4	5	3	3	5	3	3	3	2	3	4	4	4	3	3	5	4
5	5	5	4	4	5	5	5	5	5	4	5	5	5	3	1	1	2	3	2	2	5	5	5	4	3	4	1	3	1	3	3	3	5	5	1	3	5	3	3	3	3	3	3	3	3	3	2	3	5
5	5	4	3	5	5	5	5	4	4	5	5	5	4	2	2	1	4	4	2	2	3	3	5	3	5	4	5	5	4	5	5	5	5	5	1	3	4	2	3	4	4	4	5	4	3	2	2	3	3
4	4	4	4	5	5	5	5	5	4	4	5	5	5	2	2	2	2	2	3	3	5	5	5	3	3	9	4	3	3	4	5	9	5	4	1	4	4	4	4	4	4	4	4	4	3	4	4	4	5
5	5	5	5	5	5	5	5	5	5	3	4	5	4	5	2	3	3	4	3	3	4	3	4	2	4	3	3	3	3	4	4	3	5	5	3	3	3	2	4	5	5	4	4	5	2	2	5	5	5
5	5	5	5	5	5	5	5	5	5	5	5	5	5	5	1	2	3	3	3	2	5	5	5	4	9	5	2	4	1	4	5	4	4	5	1	4	5	5	9	4	5	4	4	4	4	2	2	4	5
5	5	5	4	5	5	5	5	4	4	4	5	5	4	3	1	1	3	2	1	1	3	3	4	4	4	2	2	4	2	4	4	5	5	5	2	4	5	2	2	5	4	2	2	4	2	2	4	4	5
5	4	5	4	5	3	4	5	4	4	5	4	5	5	2	2	2	3	3	3	4	3	4	4	3	4	3	4	4	1	5	5	3	5	5	2	4	5	3	3	3	4	4	5	4	4	5	4	5	5
5	5	5	3	5	5	5	5	5	5	1	4	5	5	4	2	1	3	3	2	4	5	5	4	3	4	4	3	4	3	4	5	5	5	4	3	4	3	2	3	5	4	4	4	4	2	2	4	5	5
5	5	4	4	5	5	5	5	5	5	3	4	5	5	3	1	2	3	3	2	3	4	5	5	2	3	4	3	3	3	4	4	5	5	5	3	4	5	2	3	4	4	3	4	4	3	2	3	4	4
5	4	4	3	5	5	5	5	4	5	5	5	5	4	2	3	2	3	2	2	1	4	4	5	3	5	3	5	5	1	5	5	5	5	5	1	1	5	2	2	4	3	5	5	4	4	2	4	4	3
4	5	5	3	5	5	5	4	5	4	5	5	5	5	4	1	1	2	1	2	2	5	5	5	5	5	1	5	5	4	4	5	5	5	5	4	4	3	5	3	4	2	5	5	4	2	2	3	3	3
5	5	5	4	5	5	5	5	5	5	5	5	5	5	1	1	1	1	2	2	2	4	4	4	4	4	3	3	4	2	3	4	4	4	4	2	2	4	2	2	5	5	3	3	5	2	2	2	5	4
5	5	5	3	5	5	5	5	5	5	5	5	5	5	4	1	1	3	3	2	2	4	3	5	2	3	3	3	3	3	4	5	4	5	5	1	3	3	2	3	4	4	5	5	5	4	2	3	3	5
5	5	5	4	5	5	5	5	5	5	4	4	4	4	2	2	2	3	3	2	3	4	4	4	4	4	4	4	4	4	4	5	5	5	4	3	3	4	2	2	3	3	5	5	4	4	3	3	4	4
5	5	5	5	5	5	5	5	4	4	4	4	4	5	2	2	2	2	1	2	2	3	3	5	3	5	3	5	5	1	4	5	5	5	5	4	4	5	4	4	5	5	5	5	5	3	1	2	4	4
5	5	4	4	5	3	5	5	4	4	3	3	4	3	3	2	2	2	2	2	2	5	5	4	5	3	3	4	4	3	5	5	5	5	5	3	4	4	4	4	4	4	3	3	4	2	2	4	5	4
5	5	5	4	5	5	5	5	5	5	5	5	5	5	3	2	2	3	3	2	2	4	4	5	1	4	5	4	3	2	4	5	5	5	5	3	5	5	2	2	2	2	2	2	2	2	2	5	5	5
5	5	5	4	3	5	5	5	4	5	4	4	4	4	4	2	3	2	2	4	3	5	5	5	5	5	4	5	5	2	5	5	5	5	5	2	4	4	2	4	4	4	4	5	5	4	4	4	4	5
5	5	5	4	5	5	5	5	5	5	5	5	5	5	1	1	1	3	3	1	1	4	4	5	3	4	1	3	5	3	3	5	4	5	5	3	4	4	4	5	5	4	4	5	4	4	1	3	3	2
5	5	5	4	5	5	5	5	5	5	5	5	5	5	4	1	1	4	5	4	5	5	5	5	4	4	4	4	4	4	4	4	4	5	5	4	4	4	2	4	4	4	4	4	4	4	5	4	5	5
5	5	4	4	5	5	5	5	5	5	4	4	5	4	3	2	1	4	5	3	2	5	5	5	3	5	5	5	5	4	5	5	5	5	5	4	5	5	4	1	2	2	4	5	3	2	2	3	4	5
5	5	5	5	5	5	5	5	5	5	5	5	5	5	4	1	1	3	3	2	2	5	5	5	5	5	5	5	4	4	3	4	4	5	5	3	4	4	2	3	3	3	2	2	3	3	3	5	5	5
5	5	5	4	4	5	5	5	5	5	5	5	5	5	3	1	2	3	3	3	2	4	4	4	3	3	4	4	5	3	4	5	5	5	5	3	4	4	4	4	3	4	4	4	4	3	3	2	5	4
3	4	5	3	5	5	5	5	5	4	5	5	5	5	1	1	1	5	4	3	4	5	5	4	3	4	5	5	5	3	5	5	5	5	4	3	5	5	5	2	5	2	5	5	2	5	5	3	3	5
5	5	4	5	5	4	5	5	5	5	5	5	5	5	3	2	2	2	1	1	2	3	3	5	4	5	5	4	4	4	4	5	5	5	5	2	2	4	3	3	4	4	4	5	4	5	4	3	2	4
5	5	5	3	5	5	5	5	5	5	4	5	5	5	4	1	1	4	3	2	1	4	5	4	3	4	5	5	5	4	5	5	4	4	4	4	4	5	4	3	3	4	4	4	5	4	4	4	5	4
5	5	5	5	5	5	5	5	5	5	4	5	5	5	3	1	2	2	2	3	3	4	4	5	4	5	5	4	5	4	4	5	5	5	5	4	5	5	2	3	2	2	2	2	3	4	2	4	5	5
[truncated: 18 more columns]

## Sheet: Data description
Domain questions of the Evidence-Based Practice Profile - Norwegian version
Item numbers	Domain	Value labels
Q1 - Q4	Relevance	1 = Not at all true, 2 = Not really true, 3 = Possibly true, 4 = Quite likely true, 5 = Very true
Q5 - Q8	Relevance	1 = No intention at all, 2 = Unlikely to consider doing it, 3 = Could consider doing it, 4 = Highly likely to consider doing it, 5 = Absolutely intend to do it/keep doing it
Q9 - Q14	Relevance	1 = Strongly disagree, 2 = Disagree, 3 = Neutral, 4 = Agree, 5 = Strongly agree
Q15 - Q 21	Sympathy	1 = Strongly disagree, 2 = Disagree, 3 = Neutral, 4 = Agree, 5 = Strongly agree. For scoring, these items need to have Likert score reversed: 1-5, 2-4, 3-3, 4-2, 5-1
Q22 - Q38	Terminology	1 = Never heard the term, 2 = Have heard it but don’t understand, 3 = Have some understanding, 4 = Understand quite well, 5 = Understand and could explain to others
Q39 - Q47	Practice	1 = Never, 2 = Monthly or less, 3 = Fortnightly, 4 = Weekly, 5 = Daily
Q48 - Q58	Confidence	1 = Not at all confident, 2 = A little confident, 3 = Reasonably confident, 4 = Quite confident, 5 = Very confident
Non-domain questions of the Evidence-Based Practice Profile - Norwegian version
Item number	Questions	Value labels: 1 Strongly disagree - 2 Disagree - 3 Neutral - 4 Agree - 5 Strongly agree
Q61	I have received good training in critical assessment of research articles
Q62	I have received good training in searching for guidelines and systematic reviews
Q67	I have received good teaching in evidence-based practice from teachers at my University College/University
Q68	I have received good training in evidence-based practice from clinical instructors in practice
Q70	My teachers expect that I apply evidence-based practice
Q71	My clinical instructors expect that I apply evidence-based practice
Demographic variables
Item number	Questions	Value labels
Q74	Health discipline	1 = Occupational therapy, 2 = Physiotherapy, 3 = Radiography, 4 = Nurse
Q75	Previous bachelor education	1 = Yes, 2 = No
Q76	Work in addition to studies	1 = 0%, 2 = 1 -20%, 3 = 21 - 50%, 4 = >50%
Q 77	Educational institution	1 = School A, 2 = School B, 3 = School C, 4 = School D
Q78	Gender	Not included in this dataset due to ethical restrictions
Q79	Age	Not included in this dataset due to ethical restrictions
